# Supplementary material for: Lack of quantitative training among early-career ecologists: a survey of the problem and potential solutions
Source: PeerJ. 2014 Mar 4;2:e285. doi: 10.7717/peerj.285 (PMC3961151; doi:10.7717/peerj.285)
Supplement: Supplemental Information 1 — Contains the 937 questionnaire answers. The first column provides names for variables. [file peerj-02-285-s001.xlsx]

## Sheet: Sheet1
	Timestamp	Goal	Background	Feeling	Modeller	MathsLevel	MoreMaths	MoreStats	MergedProg	Percentage	Lacking	Satisfied	Status	Sex	Origin
1	2/12/2012 19:35:42	Statistics	Biology	2	3	Too low	Yes, at both levels	Yes, at both levels	Merged	40	Calculus , Linear algebra , Graph theory	No	PhD student	Male	North America
2	2/12/2012 19:40:30	Statistics, Theory	Biology	5	4	Too low	Yes, at both levels	Yes, at both levels	Merged	40	Probability, Linear algebra , Graph theory	No	Postdoc	Male	Europe
3	2/12/2012 20:00:36	Statistics, Theory, Decision making	Biology	4	3	Too low	Yes, at both levels	Yes, at both levels	Merged	40	Probability, Linear algebra	No	PhD student	Female	North America
4	2/12/2012 20:02:51	Statistics	Biology	2	3	Too low	Yes, at undergraduate level	Yes, at undergraduate level	Merged	50	Probability, Calculus , Linear algebra , Graph theory, Geometry	No	PhD student	Female	North America
5	2/12/2012 20:36:34	Statistics	Biology	2	2	Too low	Yes, at undergraduate level	Yes, at both levels	Merged	30	Calculus , Linear algebra , Graph theory	No	Lecturer and above	Male	North America
6	2/12/2012 20:59:06	Statistics, Theory, Decision making	Biology	5	4	Too low	Yes, at undergraduate level	Yes, at undergraduate level	Merged	20	Probability, Calculus , Graph theory	No	Lecturer and above	Male	Europe
7	2/13/2012 3:53:12	Statistics	Other	3	2	Too low	Yes, at both levels	Yes, at both levels	Merged	20	Probability, Linear algebra , Graph theory	No	PhD student	Male	North America
8	2/13/2012 3:55:08	Theory	Other	3	5	Too low	Yes, at undergraduate level	Yes, at undergraduate level	Separated	30	Probability, Other	No	Postdoc	Male	Europe
9	2/13/2012 3:56:17	Statistics	Other	3	2	Just right	No	Yes, at graduate level	Separated	20	Probability, Graph theory, Geometry	Yes	Other	Female	Australia and New Zealand
10	2/13/2012 4:41:17	Statistics	Biology	2	3	Too low	Yes, at both levels	Yes, at both levels	Merged	40	Probability, Calculus , Linear algebra , Graph theory	No	PhD student	Male	Europe
11	2/13/2012 5:58:06	Statistics, Decision making	Biology	4	3	Just right	Yes, at undergraduate level	Yes, at graduate level	Merged	30	Calculus , Geometry	No	PhD student	Female	Europe
12	2/13/2012 6:59:47	Statistics, Theory	Biology	4	4	Too low	Yes, at graduate level	Yes, at both levels	Merged	30	Probability, Linear algebra , Graph theory	No	PhD student	Female	Europe
13	2/13/2012 7:35:53	Statistics	Biology	3	2	Just right	Yes, at graduate level	Yes, at both levels	Separated	30	Probability, Calculus , Linear algebra , Graph theory, Geometry	No	PhD student	Male	Europe
14	2/13/2012 7:42:19	Statistics, Theory, Decision making	Biology	4	3	Too low	No	Yes, at both levels	Merged	10	Calculus	Yes	PhD student	Male	Europe
15	2/13/2012 7:47:04	Statistics	Biology	4	1	Just right	Yes, at undergraduate level	Yes, at both levels	Separated	30	Probability	No	Postdoc	Male	Europe
16	2/13/2012 8:05:09	Statistics, Theory	Biology	4	3	Too low	Yes, at both levels	Yes, at both levels	Merged	50	Calculus	Yes	Other	Male	Asia
17	2/13/2012 8:11:13	Statistics	Biology	4	4	Too low	Yes, at undergraduate level	No	Merged	50	Calculus , Linear algebra , Graph theory	No	Postdoc	Male	Europe
18	2/13/2012 8:29:19	Statistics	Biology	3	2	Too low	No	Yes, at both levels	Merged	30	Probability	No	PhD student	Female	Europe
19	2/13/2012 8:42:36	Statistics	Biology	4	3	Too low	Yes, at both levels	Yes, at both levels	Merged	30	NA	No	Postdoc	Male	Europe
20	2/13/2012 8:49:20	Statistics, Theory	Biology	5	4	Too low	Yes, at both levels	Yes, at both levels	Merged	20	NA	Yes	Lecturer and above	Female	North America
21	2/13/2012 9:02:07	Statistics	Biology	2	5	Too high	No	No	Merged	30	Calculus , Linear algebra	No	Lecturer and above	Male	Europe
22	2/13/2012 9:16:47	Statistics, Theory, Decision making	Biology	5	5	Just right	Yes, at both levels	Yes, at both levels	Separated	20	Calculus , Other	Yes	PhD student	Male	South America
23	2/13/2012 9:18:16	Statistics	Biology	2	2	Too high	Yes, at undergraduate level	Yes, at both levels	Separated	40	Calculus	Yes	PhD student	Male	Europe
24	2/13/2012 9:18:39	Statistics	Biology	1	1	Too low	Yes, at graduate level	Yes, at both levels	Merged	20	Probability, Geometry	No	PhD student	Female	Europe
25	2/13/2012 9:21:16	Statistics, Theory	Biology	3	3	Too low	Yes, at both levels	Yes, at both levels	Separated	20	Calculus , Linear algebra , Graph theory	No	PhD student	Male	Europe
26	2/13/2012 9:34:43	Statistics, Decision making	Biology	4	3	Too low	Yes, at both levels	Yes, at both levels	Separated	30	Probability, Calculus , Linear algebra , Graph theory	Yes	PhD student	Male	Europe
27	2/13/2012 9:41:54	NA	Biology	1	1	Too low	Yes, at graduate level	Yes, at graduate level	Merged	30	Probability, Calculus , Linear algebra , Graph theory, Geometry	No	Postdoc	Male	Asia
28	2/13/2012 9:52:10	Statistics, Theory	Biology	2	4	Too low	Yes, at both levels	Yes, at graduate level	Merged	30	Probability, Calculus , Linear algebra	No	PhD student	Female	Europe
29	2/13/2012 10:04:26	Statistics	Biology	4	3	Too low	Yes, at both levels	Yes, at both levels	Merged	40	Probability, Calculus , Linear algebra	No	Postdoc	Male	Europe
30	2/13/2012 10:11:31	Statistics	Biology	2	2	Too low	Yes, at both levels	Yes, at both levels	Merged	70	Probability, Calculus , Linear algebra , Graph theory	No	PhD student	Male	Australia and New Zealand
31	2/13/2012 10:11:33	Statistics	Biology	2	1	Just right	Yes, at both levels	Yes, at graduate level	Separated	10	Calculus , Linear algebra	No	PhD student	Male	Europe
32	2/13/2012 10:15:10	Statistics	Biology	2	1	Too low	Yes, at graduate level	Yes, at both levels	Separated	30	Probability, Graph theory, Other	No	PhD student	Male	Africa
33	2/13/2012 10:15:52	Statistics	Biology	3	2	Too low	Yes, at both levels	Yes, at both levels	Merged	40	Calculus	No	PhD student	Male	Europe
34	2/13/2012 10:21:09	Statistics, Theory	Biology	2	4	Too low	Yes, at graduate level	Yes, at both levels	Merged	10	Probability, Calculus , Linear algebra , Graph theory	No	Postdoc	Male	Europe
35	2/13/2012 11:05:24	Statistics, Theory	Physics	5	5	Just right	Yes, at both levels	Yes, at both levels	Merged	30	NA	Yes	Postdoc	Male	Europe
36	2/13/2012 11:30:11	Statistics, Theory	Biology	2	2	Too low	Yes, at both levels	Yes, at both levels	Merged	20	Calculus , Graph theory	No	PhD student	Female	North America
37	2/13/2012 12:10:05	Statistics	Biology	4	4	Too low	Yes, at both levels	Yes, at both levels	Merged	30	Probability, Linear algebra , Graph theory	No	Postdoc	Male	Europe
38	2/13/2012 13:07:45	Statistics	Biology	4	2	Too low	Yes, at undergraduate level	Yes, at graduate level	Separated	20	Probability	Yes	Postdoc	Male	Europe
39	2/13/2012 13:08:57	Statistics	Biology	3	4	Just right	Yes, at both levels	Yes, at both levels	Separated	30	Linear algebra	No	PhD student	Female	Europe
40	2/13/2012 14:17:33	Statistics, Decision making	Biology	4	3	Just right	Yes, at both levels	Yes, at both levels	Merged	70	Probability, Calculus , Graph theory, Other	No	Other	Male	North America
41	2/13/2012 14:18:14	Statistics, Theory	Biology	5	4	Too low	Yes, at both levels	Yes, at undergraduate level	Separated	30	Probability, Calculus , Linear algebra	No	Lecturer and above	Male	Europe
42	2/13/2012 14:23:50	Statistics	Biology	3	4	Too low	Yes, at undergraduate level	Yes, at graduate level	Separated	20	Graph theory	No	Other	Male	Europe
43	2/13/2012 14:27:49	Statistics	Biology	2	3	Too low	Yes, at both levels	Yes, at both levels	Merged	50	Probability, Calculus , Linear algebra , Graph theory, Geometry, Other	No	Lecturer and above	Female	Europe
44	2/13/2012 14:38:41	Statistics	Biology	2	3	Just right	Yes, at graduate level	Yes, at graduate level	Merged	30	Probability, Graph theory	No	Other	Female	North America
45	2/13/2012 14:39:32	Statistics	Biology	3	2	Too low	Yes, at both levels	Yes, at undergraduate level	Separated	20	Calculus , Linear algebra , Graph theory	No	Other	Female	North America
46	2/13/2012 14:39:49	Statistics	Biology	3	2	Too low	Yes, at both levels	Yes, at undergraduate level	Merged	30	Calculus , Linear algebra , Graph theory	No	Other	Female	Europe
47	2/13/2012 14:46:06	Statistics	Biology	5	4	Too low	Yes, at both levels	Yes, at both levels	Merged	30	Calculus	Yes	PhD student	Male	Europe
48	2/13/2012 14:47:33	Statistics	Biology	3	2	Just right	Yes, at both levels	Yes, at both levels	Merged	10	Graph theory	No	Other	Female	North America
49	2/13/2012 14:51:08	Statistics, Theory, Decision making	Biology	3	4	Too low	Yes, at both levels	Yes, at both levels	Merged	20	Probability, Linear algebra , Graph theory	No	PhD student	Male	Europe
50	2/13/2012 14:57:52	Statistics, Theory	Other	3	3	Too low	Yes, at both levels	Yes, at both levels	Separated	50	Probability, Calculus , Linear algebra , Graph theory	No	Lecturer and above	Female	North America
51	2/13/2012 15:01:15	Statistics	Biology	3	3	Too low	Yes, at both levels	Yes, at both levels	Separated	30	Probability, Calculus , Linear algebra , Graph theory, Geometry, Other	No	Other	Male	South America
52	2/13/2012 15:11:18	Statistics	Biology	2	2	Too low	Yes, at graduate level	No	Merged	20	Probability, Geometry	No	Other	Female	North America
53	2/13/2012 15:12:37	Statistics, Theory	Biology	4	4	Too low	Yes, at both levels	No	Merged	30	Graph theory	No	PhD student	Male	North America
54	2/13/2012 15:14:40	Statistics	Biology	4	3	Too low	Yes, at both levels	Yes, at both levels	Merged	40	Calculus , Linear algebra	No	Lecturer and above	Female	North America
55	2/13/2012 15:25:14	Statistics	Biology	3	1	Too low	Yes, at undergraduate level	Yes, at undergraduate level	Separated	20	Calculus , Linear algebra , Graph theory	No	Other	Female	North America
56	2/13/2012 15:26:07	Statistics	Biology	3	1	Too low	Yes, at both levels	Yes, at both levels	Merged	10	Probability	No	Other	Male	Europe
57	2/13/2012 15:28:37	Statistics	Biology	3	4	Too low	No	Yes, at undergraduate level	Merged	20	Calculus , Linear algebra , Other	Yes	PhD student	Female	North America
58	2/13/2012 15:59:14	Statistics	Biology	2	3	Too low	Yes, at both levels	Yes, at both levels	Merged	20	Probability, Calculus , Linear algebra , Graph theory	No	Other	Male	North America
59	2/13/2012 16:15:38	Statistics, Theory	Biology	5	4	Too low	Yes, at both levels	Yes, at both levels	Merged	50	Probability, Calculus , Linear algebra	No	PhD student	Male	North America
60	2/13/2012 16:17:20	Statistics, Theory	Applied or pure mathematics	5	5	Too low	Yes, at both levels	Yes, at graduate level	Merged	30	Other	Yes	Postdoc	Male	North America
61	2/13/2012 16:17:38	Statistics	Biology	2	2	Too low	Yes, at both levels	Yes, at both levels	Separated	20	Probability, Linear algebra , Geometry	No	PhD student	Female	North America
62	2/13/2012 16:22:45	Statistics	Biology	5	3	Just right	Yes, at undergraduate level	Yes, at both levels	Merged	40	Calculus , Linear algebra	No	Other	Male	North America
63	2/13/2012 16:30:11	Statistics, Theory	Biology	2	3	Too low	Yes, at graduate level	Yes, at both levels	Merged	30	Probability, Linear algebra , Graph theory	No	PhD student	Male	South America
64	2/13/2012 16:37:12	Statistics	Biology	2	4	Just right	Yes, at undergraduate level	Yes, at undergraduate level	Separated	10	Probability, Graph theory	No	Other	Male	Europe
65	2/13/2012 16:46:40	Statistics	Biology	2	3	Too low	Yes, at undergraduate level	Yes, at undergraduate level	Separated	20	Calculus , Linear algebra , Graph theory	No	Other	Female	North America
66	2/13/2012 16:47:30	Statistics, Theory	Biology	5	5	Too low	Yes, at both levels	Yes, at both levels	Merged	20	Probability, Calculus , Linear algebra	No	PhD student	Female	Europe
67	2/13/2012 17:07:07	Statistics, Decision making	Biology	2	3	Too low	Yes, at both levels	Yes, at both levels	Separated	30	Probability, Calculus , Graph theory, Geometry	No	Lecturer and above	Female	North America
68	2/13/2012 17:08:34	Statistics, Decision making	Biology	5	4	Just right	Yes, at both levels	Yes, at both levels	Separated	20	Other	Yes	PhD student	Male	North America
69	2/13/2012 17:22:52	Statistics, Theory, Decision making	NA	3	3	Just right	Yes, at graduate level	Yes, at both levels	Separated	50	Graph theory	No	Lecturer and above	Female	North America
70	2/13/2012 17:36:46	Statistics	Biology	3	4	Just right	Yes, at graduate level	Yes, at both levels	Merged	40	Probability, Graph theory	No	Other	Female	Europe
71	2/13/2012 17:48:22	Statistics, Theory, Decision making	Biology	5	2	Too low	Yes, at graduate level	Yes, at both levels	Separated	20	Calculus	No	PhD student	Female	North America
72	2/13/2012 17:51:29	Statistics, Theory, Decision making	Biology	3	2	Just right	No	Yes, at both levels	Merged	20	Calculus	No	PhD student	Male	North America
73	2/13/2012 18:20:35	Statistics, Theory	Biology	4	4	Too low	Yes, at undergraduate level	Yes, at undergraduate level	Separated	40	Probability, Calculus , Linear algebra , Graph theory, Geometry	No	Postdoc	Female	Europe
74	2/13/2012 18:29:10	Statistics, Theory	Biology	5	5	Just right	Yes, at both levels	Yes, at both levels	Merged	20	Linear algebra	Yes	Postdoc	Male	Europe
75	2/13/2012 18:43:27	Theory	Biology	5	5	Too low	Yes, at both levels	Yes, at both levels	Merged	30	Probability, Graph theory	Yes	Lecturer and above	Male	Europe
76	2/13/2012 19:11:19	Statistics	Biology	3	3	Too low	Yes, at both levels	Yes, at undergraduate level	Merged	30	Probability, Graph theory, Other	No	PhD student	Male	Europe
77	2/13/2012 19:18:07	Statistics, Theory	Biology	3	2	Too low	Yes, at both levels	Yes, at both levels	Merged	20	Probability, Calculus , Other	No	Other	Female	North America
78	2/13/2012 20:46:02	Statistics	Biology	2	3	Too low	Yes, at graduate level	Yes, at graduate level	Merged	20	Probability, Geometry	No	PhD student	Male	Europe
79	2/13/2012 21:28:50	Statistics, Theory	Biology	5	5	Just right	Yes, at undergraduate level	Yes, at both levels	Separated	50	Probability, Graph theory	Yes	Postdoc	Male	Europe
80	2/13/2012 21:34:07	Statistics	Biology	3	1	Too low	Yes, at both levels	Yes, at both levels	Separated	20	Calculus , Linear algebra , Graph theory	No	PhD student	Female	North America
81	2/13/2012 21:45:02	Statistics	Biology	1	4	Just right	No	Yes, at graduate level	Merged	40	Probability, Graph theory	No	PhD student	Female	North America
82	2/13/2012 22:08:06	Statistics	Other	5	4	Just right	No	Yes, at both levels	Separated	10	Probability	Yes	Lecturer and above	Male	Europe
83	2/13/2012 22:11:18	Statistics, Theory	Other	5	5	Too low	Yes, at both levels	Yes, at both levels	Merged	20	NA	Yes	Postdoc	Male	Europe
84	2/13/2012 22:17:05	Statistics, Theory	Biology	4	3	Too low	Yes, at both levels	Yes, at both levels	Merged	20	Probability	No	Lecturer and above	Male	Europe
85	2/13/2012 22:21:53	Statistics	Biology	3	2	Just right	No	Yes, at both levels	Merged	10	NA	No	Lecturer and above	Female	North America
86	2/13/2012 22:24:24	Statistics, Theory	Other	4	4	Too low	Yes, at both levels	Yes, at both levels	Separated	50	Probability	Yes	Postdoc	Male	Europe
87	2/13/2012 22:35:05	Statistics, Theory	Biology	4	5	Too low	Yes, at both levels	Yes, at graduate level	NA	20	Calculus , Linear algebra , Graph theory	No	PhD student	Female	Europe
88	2/13/2012 22:41:40	Statistics	Biology	5	2	Too low	Yes, at both levels	Yes, at undergraduate level	Merged	30	Other	No	PhD student	Female	North America
89	2/13/2012 22:50:48	Statistics, Theory	Biology	3	5	Just right	Yes, at undergraduate level	Yes, at both levels	Merged	20	Probability, Calculus , Graph theory	No	PhD student	Male	Europe
90	2/13/2012 22:57:56	Statistics, Theory	Biology	5	2	Too low	Yes, at graduate level	Yes, at both levels	Merged	10	NA	Yes	PhD student	Female	Europe
91	2/13/2012 23:04:00	Decision making	Other	2	3	Too low	Yes, at graduate level	Yes, at both levels	Merged	30	Probability, Linear algebra , Graph theory	No	Other	Female	North America
92	2/14/2012 1:34:54	Statistics	Biology	2	2	Too low	Yes, at both levels	Yes, at both levels	Merged	20	Probability	No	PhD student	Female	Europe
93	2/14/2012 1:49:30	Statistics	Biology	2	2	Too low	Yes, at both levels	Yes, at both levels	Separated	10	Probability, Calculus , Linear algebra , Graph theory, Geometry	No	PhD student	Female	Europe
94	2/14/2012 3:33:40	Statistics	Biology	3	1	Too low	Yes, at graduate level	Yes, at graduate level	Separated	40	Probability, Calculus , Linear algebra , Graph theory	No	PhD student	Female	North America
95	2/14/2012 4:21:49	Statistics, Theory, Decision making	Biology	1	2	Just right	Yes, at graduate level	Yes, at graduate level	Separated	30	Calculus , Linear algebra , Graph theory, Geometry	No	PhD student	Female	North America
96	2/14/2012 8:07:40	Statistics	Biology	5	1	Too low	Yes, at both levels	Yes, at both levels	Separated	10	Probability, Other	No	Lecturer and above	Male	Africa
97	2/14/2012 8:08:45	Statistics	Biology	2	2	Too low	Yes, at undergraduate level	Yes, at graduate level	Merged	20	Calculus , Other	No	Postdoc	Female	Europe
98	2/14/2012 9:02:22	Statistics	Biology	3	2	Just right	Yes, at graduate level	Yes, at both levels	Merged	10	Probability	No	PhD student	Female	Europe
99	2/14/2012 9:14:46	Statistics	Biology	2	2	Too low	Yes, at both levels	Yes, at both levels	Merged	40	Probability, Calculus , Other	No	Postdoc	Female	Europe
100	2/14/2012 9:20:42	Statistics	Biology	3	4	Just right	Yes, at both levels	Yes, at both levels	Merged	10	Linear algebra	No	PhD student	Male	Europe
101	2/14/2012 9:24:51	Statistics, Decision making	Biology	2	3	Just right	No	No	Merged	10	Graph theory	No	PhD student	Female	Africa
102	2/14/2012 9:27:25	Statistics	Biology	2	3	Just right	Yes, at undergraduate level	Yes, at graduate level	Separated	20	Probability	No	PhD student	Female	Europe
103	2/14/2012 9:30:08	Statistics	Biology	1	1	Just right	NA	No	NA	0	Graph theory	Yes	Lecturer and above	Male	Europe
104	2/14/2012 9:34:28	Statistics	Biology	3	1	Too low	Yes, at undergraduate level	Yes, at both levels	Separated	20	Probability, Calculus , Linear algebra , Graph theory	No	Postdoc	Male	Europe
105	2/14/2012 9:54:50	Statistics	Biology	2	3	Too low	Yes, at both levels	Yes, at both levels	Separated	20	Calculus , Linear algebra	No	PhD student	Female	Europe
106	2/14/2012 9:54:59	Statistics	Biology	2	1	Too low	Yes, at graduate level	Yes, at both levels	Separated	20	Probability, Graph theory	No	Other	Female	Europe
107	2/14/2012 9:58:16	Statistics, Decision making	Biology	4	4	Just right	No	Yes, at both levels	Merged	20	Graph theory	Yes	Postdoc	Female	North America
108	2/14/2012 10:00:53	Statistics, Theory	Biology	3	3	Too low	Yes, at both levels	Yes, at both levels	Merged	30	Probability, Calculus , Linear algebra	No	Postdoc	Male	Europe
109	2/14/2012 10:21:57	Statistics	Biology	4	1	Too low	Yes, at both levels	Yes, at both levels	Merged	30	Probability, Calculus , Linear algebra , Graph theory, Geometry	No	PhD student	Male	Europe
110	2/14/2012 10:22:43	Statistics	Biology	4	3	Too low	Yes, at graduate level	Yes, at both levels	Separated	30	Probability, Calculus , Linear algebra , Graph theory, Geometry	No	Postdoc	Male	North America
111	2/14/2012 10:31:26	Statistics, Decision making	Biology	2	1	Too high	Yes, at graduate level	Yes, at graduate level	Merged	20	Calculus , Graph theory	Yes	Other	Female	Europe
112	2/14/2012 10:41:02	Statistics	Biology	3	2	Just right	Yes, at graduate level	Yes, at both levels	Merged	20	Probability, Linear algebra	Yes	PhD student	Female	Europe
113	2/14/2012 11:03:43	Statistics	Biology	4	5	Too low	Yes, at graduate level	Yes, at graduate level	Merged	40	Calculus , Linear algebra	Yes	Postdoc	Male	Europe
114	2/14/2012 11:22:42	Statistics	Biology	4	3	Too low	Yes, at graduate level	Yes, at both levels	Separated	40	Calculus , Linear algebra , Graph theory	No	PhD student	Male	North America
115	2/14/2012 11:46:05	Statistics	Biology	4	2	Too low	Yes, at graduate level	Yes, at both levels	Separated	20	Probability, Calculus , Linear algebra	No	Postdoc	Male	North America
116	2/14/2012 11:52:43	Statistics	Biology	3	2	Too low	Yes, at both levels	Yes, at both levels	Merged	20	Probability, Linear algebra , Graph theory	No	Lecturer and above	Male	Europe
117	2/14/2012 12:24:41	Statistics, Theory, Decision making	Other	4	4	Too low	Yes, at undergraduate level	Yes, at both levels	Separated	30	Probability, Calculus , Linear algebra , Graph theory	No	Postdoc	Female	Europe
118	2/14/2012 13:19:52	Statistics, Decision making	Biology	1	2	Too low	Yes, at both levels	Yes, at both levels	Separated	20	Probability, Calculus , Linear algebra	No	PhD student	Female	Europe
119	2/14/2012 15:05:35	Statistics, Theory	Biology	4	4	Too low	Yes, at graduate level	Yes, at undergraduate level	Merged	30	Probability, Calculus , Linear algebra	No	PhD student	Female	North America
120	2/14/2012 15:49:09	Statistics	Biology	3	2	Too low	Yes, at graduate level	Yes, at both levels	Merged	30	Probability, Calculus , Graph theory	No	PhD student	Male	North America
121	2/14/2012 16:07:12	Statistics	Biology	3	3	NA	Yes, at both levels	Yes, at both levels	Merged	30	Probability, Linear algebra , Graph theory	No	PhD student	Female	North America
122	2/14/2012 17:10:17	Statistics	Biology	1	1	Just right	Yes, at undergraduate level	No	Separated	20	Probability, Calculus , Linear algebra , Graph theory	No	Other	Female	North America
123	2/14/2012 20:14:10	Statistics, Theory	Biology	5	5	Too low	Yes, at both levels	Yes, at both levels	Separated	30	Probability, Linear algebra	No	Lecturer and above	Male	Europe
124	2/14/2012 20:51:49	Statistics, Theory	Biology	5	3	Too low	Yes, at both levels	Yes, at both levels	Merged	20	Calculus , Linear algebra	No	PhD student	Female	Europe
125	2/14/2012 21:34:33	Statistics	Biology	4	3	Just right	No	Yes, at graduate level	Separated	10	NA	Yes	PhD student	Male	Europe
126	2/15/2012 10:48:55	Statistics, Decision making	Biology	3	3	Too low	Yes, at both levels	Yes, at undergraduate level	Merged	30	Probability, Calculus , Linear algebra , Graph theory	No	Lecturer and above	Male	Europe
127	2/15/2012 23:30:39	Statistics	Biology	3	3	Too high	Yes, at both levels	Yes, at both levels	Merged	40	Probability, Calculus , Linear algebra , Graph theory, Geometry	No	PhD student	Female	Europe
128	2/15/2012 23:38:55	Statistics	Biology	2	3	Too low	Yes, at undergraduate level	Yes, at undergraduate level	Separated	30	Probability, Graph theory	No	Other	Female	Europe
129	2/16/2012 10:14:40	Statistics	Biology	3	4	Just right	No	Yes, at both levels	Merged	40	Linear algebra , Graph theory	No	PhD student	Male	Europe
130	2/16/2012 10:15:49	Statistics, Theory, Decision making	Biology	3	4	Just right	Yes, at both levels	Yes, at both levels	Separated	20	Linear algebra , Graph theory, Geometry	Yes	Other	Male	Europe
131	2/16/2012 10:56:41	Statistics	Biology	4	1	Too low	Yes, at both levels	Yes, at both levels	Merged	30	Probability	No	PhD student	Male	South America
132	2/16/2012 13:00:37	Statistics, Theory	Applied or pure mathematics	5	5	Too low	Yes, at both levels	Yes, at both levels	Separated	50	Probability, Graph theory	No	PhD student	Female	Europe
133	2/16/2012 13:10:13	Statistics	Biology	3	2	Just right	No	No	Separated	20	Geometry	Yes	PhD student	Female	Europe
134	2/16/2012 13:38:06	Statistics	Biology	1	2	Just right	Yes, at undergraduate level	Yes, at both levels	Merged	30	Probability, Linear algebra , Graph theory	No	PhD student	Female	North America
135	2/16/2012 14:13:15	Statistics	Biology	3	4	Too low	Yes, at graduate level	Yes, at both levels	Merged	40	Probability, Calculus	No	PhD student	Female	Europe
136	2/16/2012 14:26:50	Statistics	Biology	3	3	Too low	Yes, at both levels	Yes, at both levels	Merged	30	Linear algebra , Geometry, Other	No	Other	Female	Asia
137	2/16/2012 14:27:01	Statistics	Biology	2	3	Too low	No	Yes, at both levels	Separated	10	Calculus	No	Lecturer and above	Male	North America
138	2/16/2012 14:27:05	Statistics, Theory	Biology	2	4	Too low	Yes, at both levels	Yes, at both levels	Separated	30	Probability, Calculus , Linear algebra , Graph theory, Other	No	PhD student	Female	Europe
139	2/16/2012 14:27:34	Statistics, Theory, Decision making	Biology	4	3	Just right	Yes, at undergraduate level	Yes, at graduate level	Merged	10	Calculus , Graph theory	No	Other	Male	North America
140	2/16/2012 14:28:51	Statistics, Theory	Biology	5	5	Too low	Yes, at both levels	Yes, at both levels	Merged	30	Calculus , Other	Yes	PhD student	Male	North America
141	2/16/2012 14:29:15	Statistics, Decision making	Biology	3	4	Too low	Yes, at graduate level	Yes, at both levels	Separated	50	Probability, Calculus , Linear algebra , Graph theory	No	Lecturer and above	Female	North America
142	2/16/2012 14:30:03	Statistics, Theory	Biology	4	3	Too low	Yes, at graduate level	Yes, at graduate level	Merged	30	Probability, Calculus , Linear algebra , Graph theory	No	Lecturer and above	Female	Europe
143	2/16/2012 14:30:13	Statistics, Theory	Biology	5	5	Too low	Yes, at both levels	Yes, at undergraduate level	Merged	20	Probability, Calculus	No	Lecturer and above	Male	Europe
144	2/16/2012 14:30:16	Statistics, Theory	Biology	3	3	Too low	Yes, at undergraduate level	Yes, at both levels	Merged	30	Probability, Linear algebra	No	Postdoc	Female	North America
145	2/16/2012 14:30:30	Statistics, Theory	Biology	4	3	Just right	Yes, at graduate level	Yes, at both levels	Merged	20	Linear algebra , Other	No	Postdoc	Female	North America
146	2/16/2012 14:30:33	Statistics, Theory, Decision making	Biology	5	5	Too low	Yes, at both levels	Yes, at both levels	Merged	30	Probability, Linear algebra , Graph theory	No	Lecturer and above	Male	North America
147	2/16/2012 14:30:44	Statistics	Other	4	2	Just right	Yes, at both levels	Yes, at both levels	Separated	20	Probability, Calculus , Linear algebra , Graph theory	No	PhD student	Male	North America
148	2/16/2012 14:30:52	Statistics, Theory, Decision making	Applied or pure mathematics	5	5	Too low	Yes, at both levels	Yes, at both levels	Separated	50	Graph theory	No	Other	NA	North America
149	2/16/2012 14:30:54	Statistics, Theory	Biology	5	5	Just right	Yes, at graduate level	Yes, at graduate level	Separated	30	Calculus , Linear algebra	Yes	PhD student	Male	North America
150	2/16/2012 14:31:26	Statistics	Biology	3	3	Too low	Yes, at both levels	Yes, at both levels	Merged	20	Probability, Calculus , Linear algebra , Graph theory, Geometry, Other	No	Lecturer and above	Male	North America
151	2/16/2012 14:31:54	Statistics, Theory	Other	4	3	Too low	Yes, at both levels	Yes, at both levels	Separated	40	Probability, Calculus	No	PhD student	Female	South America
152	2/16/2012 14:32:29	Statistics, Decision making	Other	4	4	Too low	Yes, at undergraduate level	Yes, at both levels	Separated	30	Graph theory	Yes	Lecturer and above	Female	North America
153	2/16/2012 14:32:30	Statistics, Theory	Biology	4	4	Too low	Yes, at graduate level	Yes, at both levels	Merged	30	Calculus , Linear algebra	No	Postdoc	Female	Europe
154	2/16/2012 14:32:35	Statistics, Theory	Biology	4	3	Too low	Yes, at both levels	Yes, at both levels	Separated	30	Probability, Calculus , Linear algebra , Geometry	No	Lecturer and above	Female	Australia and New Zealand
155	2/16/2012 14:32:43	Statistics	Biology	5	4	Just right	Yes, at both levels	Yes, at both levels	Merged	50	Graph theory, Geometry, Other	Yes	Lecturer and above	Male	Europe
156	2/16/2012 14:33:08	Statistics, Theory	Biology	4	4	Too low	Yes, at both levels	Yes, at both levels	Merged	30	Probability, Linear algebra , Graph theory	No	PhD student	Female	North America
157	2/16/2012 14:33:21	Statistics, Theory	Applied or pure mathematics	5	3	Too low	Yes, at both levels	Yes, at both levels	Merged	30	Other	Yes	Lecturer and above	Female	Europe
158	2/16/2012 14:33:21	Statistics	Biology	3	3	Too low	Yes, at both levels	Yes, at both levels	Merged	20	Calculus , Linear algebra	No	Lecturer and above	Male	Europe
159	2/16/2012 14:33:22	Statistics	Other	3	1	Too low	Yes, at both levels	Yes, at both levels	Merged	10	Calculus , Linear algebra	No	PhD student	Female	North America
160	2/16/2012 14:33:22	Statistics	Biology	4	3	Too low	Yes, at graduate level	Yes, at both levels	Merged	30	Calculus , Linear algebra	No	PhD student	Female	North America
161	2/16/2012 14:33:28	Statistics, Theory	Biology	4	3	Too low	Yes, at graduate level	Yes, at both levels	Merged	20	Calculus , Linear algebra	No	Postdoc	Female	Europe
162	2/16/2012 14:33:46	Statistics, Decision making	Biology	5	3	Too low	Yes, at both levels	Yes, at both levels	Merged	40	Probability, Calculus	No	Other	Male	North America
163	2/16/2012 14:34:11	Statistics	Other	1	3	Too low	No	Yes, at both levels	Separated	30	Probability	No	Other	Female	North America
164	2/16/2012 14:35:35	Statistics, Theory	Biology	4	4	Too low	Yes, at graduate level	Yes, at both levels	Merged	30	Probability, Calculus , Linear algebra , Graph theory	No	PhD student	Male	Asia
165	2/16/2012 14:35:54	Statistics	Biology	3	2	Too low	No	Yes, at both levels	Merged	50	Probability, Graph theory	Yes	PhD student	Female	North America
166	2/16/2012 14:37:17	Statistics, Theory, Decision making	Biology	4	4	Too low	Yes, at both levels	Yes, at both levels	Merged	20	Calculus , Linear algebra	No	PhD student	Female	North America
167	2/16/2012 14:37:34	Statistics, Theory	Biology	4	5	Too low	Yes, at undergraduate level	Yes, at graduate level	Merged	30	Probability, Calculus , Linear algebra	No	Postdoc	Male	North America
168	2/16/2012 14:39:26	Statistics, Theory	Biology	5	4	Too low	Yes, at undergraduate level	Yes, at both levels	Merged	40	Probability, Calculus , Linear algebra , Graph theory, Geometry	No	Other	Male	North America
169	2/16/2012 14:39:32	Statistics, Theory, Decision making	Biology	5	3	Just right	Yes, at both levels	Yes, at both levels	Merged	30	Probability, Calculus	No	PhD student	Male	North America
170	2/16/2012 14:40:53	Statistics	Biology	4	5	Too low	Yes, at both levels	Yes, at both levels	Merged	20	Probability, Calculus , Linear algebra	No	Other	Male	North America
171	2/16/2012 14:41:25	Statistics	Biology	3	1	Too low	Yes, at both levels	Yes, at both levels	Separated	10	Probability, Linear algebra	Yes	PhD student	Female	Europe
172	2/16/2012 14:44:53	Statistics, Theory	Biology	3	3	Just right	Yes, at both levels	Yes, at both levels	Merged	50	Calculus , Linear algebra	No	Lecturer and above	Male	Europe
173	2/16/2012 14:46:03	Statistics	NA	3	3	Too low	Yes, at both levels	Yes, at both levels	Merged	50	Probability, Calculus , Graph theory	No	PhD student	Female	North America
174	2/16/2012 14:48:18	Statistics, Theory	Other	5	5	Just right	Yes, at both levels	Yes, at both levels	Merged	30	Graph theory	Yes	PhD student	Male	North America
175	2/16/2012 14:50:10	Statistics	Biology	4	2	Too low	Yes, at both levels	Yes, at both levels	Separated	20	Probability, Calculus , Linear algebra , Graph theory	No	PhD student	Male	Europe
176	2/16/2012 14:51:06	Statistics	Biology	3	2	Just right	Yes, at graduate level	Yes, at undergraduate level	Merged	20	Probability, Calculus , Linear algebra	No	Lecturer and above	Female	North America
177	2/16/2012 14:51:10	Statistics, Decision making	Biology	4	4	Just right	No	Yes, at graduate level	Separated	20	Other	Yes	Other	Female	North America
178	2/16/2012 14:53:53	Statistics	Biology	5	3	Just right	No	Yes, at both levels	Separated	30	Probability, Graph theory	No	Postdoc	Male	North America
179	2/16/2012 14:53:54	Statistics, Decision making	Biology	3	2	Too low	Yes, at undergraduate level	Yes, at both levels	Separated	30	Linear algebra , Graph theory	No	Other	Male	North America
180	2/16/2012 14:54:14	Statistics, Theory	Biology	5	4	Too low	Yes, at both levels	Yes, at undergraduate level	Merged	30	Probability, Calculus , Linear algebra , Geometry	Yes	PhD student	Male	North America
181	2/16/2012 14:54:56	Statistics	Biology	3	1	Too low	No	Yes, at both levels	Merged	20	Probability, Linear algebra	No	PhD student	Female	North America
182	2/16/2012 14:59:30	Statistics	Physics	4	5	Too low	Yes, at undergraduate level	Yes, at both levels	Separated	50	Graph theory, Geometry	No	PhD student	Male	Europe
183	2/16/2012 14:59:33	Statistics	Other	2	2	Just right	Yes, at both levels	Yes, at both levels	Merged	50	Probability, Calculus , Linear algebra	No	PhD student	Female	North America
184	2/16/2012 14:59:48	Statistics, Decision making	Biology	3	4	Too low	Yes, at both levels	Yes, at both levels	Separated	50	Calculus , Linear algebra , Graph theory	No	Postdoc	Female	Europe
185	2/16/2012 15:00:13	Statistics	Biology	5	5	Too low	Yes, at undergraduate level	Yes, at graduate level	Merged	30	Linear algebra	No	Other	Male	North America
186	2/16/2012 15:00:33	Statistics, Theory	Biology	4	5	Too low	Yes, at graduate level	Yes, at undergraduate level	Separated	20	Calculus , Linear algebra , Other	No	PhD student	Female	Europe
187	2/16/2012 15:01:25	Statistics, Decision making	Biology	3	2	Too low	Yes, at both levels	Yes, at both levels	Merged	40	Calculus , Graph theory	No	PhD student	Female	North America
188	2/16/2012 15:03:21	Statistics, Decision making	Biology	4	2	Too low	Yes, at both levels	Yes, at both levels	Merged	50	Graph theory, Geometry	Yes	Lecturer and above	Female	North America
189	2/16/2012 15:04:54	Statistics, Decision making	Biology	4	5	Too low	Yes, at both levels	Yes, at graduate level	Merged	30	Calculus , Graph theory	No	Other	Male	North America
190	2/16/2012 15:05:00	Statistics	Biology	3	3	Too low	Yes, at both levels	Yes, at both levels	Merged	40	Probability, Calculus , Linear algebra , Graph theory, Geometry, Other	No	Other	Male	North America
191	2/16/2012 15:06:15	Theory	Biology	4	5	Too low	Yes, at both levels	Yes, at both levels	Separated	20	Graph theory, Geometry, Other	Yes	Postdoc	Male	Europe
192	2/16/2012 15:06:37	Statistics, Theory	Biology	4	3	Too low	Yes, at both levels	Yes, at both levels	Merged	50	Graph theory, Other	Yes	PhD student	Male	North America
193	2/16/2012 15:08:47	NA	Biology	1	1	Too low	Yes, at both levels	Yes, at both levels	Merged	30	Calculus , Graph theory	No	PhD student	Female	North America
194	2/16/2012 15:11:49	Statistics, Theory	Biology	5	5	Too low	Yes, at undergraduate level	Yes, at both levels	Merged	30	Graph theory	Yes	Lecturer and above	Male	North America
195	2/16/2012 15:12:15	Statistics, Decision making	Biology	5	5	Too low	Yes, at both levels	Yes, at both levels	Merged	50	NA	Yes	Lecturer and above	Male	North America
196	2/16/2012 15:12:17	Statistics	Biology	4	2	Too low	Yes, at both levels	Yes, at both levels	Merged	30	Probability, Calculus , Linear algebra , Graph theory, Geometry	No	Other	Female	North America
197	2/16/2012 15:13:31	Statistics	Biology	1	2	Too low	Yes, at both levels	Yes, at both levels	Separated	30	Calculus , Linear algebra	No	Postdoc	Female	Europe
198	2/16/2012 15:14:24	Statistics	Biology	4	4	Too low	Yes, at both levels	Yes, at both levels	Merged	20	Calculus , Linear algebra	No	PhD student	Female	North America
199	2/16/2012 15:15:40	Statistics	Other	4	3	Too low	Yes, at both levels	Yes, at both levels	Separated	30	Calculus	No	PhD student	Male	North America
200	2/16/2012 15:15:50	Statistics, Theory	Biology	2	3	Just right	No	Yes, at both levels	Separated	30	Graph theory	Yes	PhD student	Female	Europe
201	2/16/2012 15:16:14	Statistics, Decision making	Biology	2	3	Too low	Yes, at both levels	Yes, at both levels	Merged	30	Graph theory	No	PhD student	Female	North America
202	2/16/2012 15:16:47	Statistics, Decision making	Biology	2	2	Too low	Yes, at both levels	Yes, at both levels	NA	0	Calculus , Linear algebra	No	Lecturer and above	NA	North America
203	2/16/2012 15:16:53	Statistics, Decision making	Biology	4	3	Too low	Yes, at both levels	Yes, at both levels	Merged	20	Probability, Linear algebra	Yes	Lecturer and above	Male	North America
204	2/16/2012 15:18:15	Statistics	Biology	3	4	Too high	Yes, at graduate level	Yes, at both levels	Merged	20	Probability, Calculus	No	PhD student	Female	Europe
205	2/16/2012 15:18:37	Statistics	Biology	3	1	Too low	Yes, at both levels	Yes, at both levels	Merged	20	Probability, Linear algebra	No	Postdoc	Female	North America
206	2/16/2012 15:18:57	Statistics	Other	3	3	Too low	Yes, at both levels	Yes, at both levels	Separated	30	Probability, Calculus , Linear algebra , Graph theory, Geometry	No	Other	Female	North America
207	2/16/2012 15:20:35	Statistics, Decision making	Biology	4	4	Just right	Yes, at graduate level	Yes, at both levels	Merged	70	Probability, Linear algebra	Yes	Other	Male	North America
208	2/16/2012 15:20:59	Statistics, Theory	Biology	5	4	Too low	Yes, at both levels	Yes, at both levels	Merged	40	Probability, Calculus , Graph theory	Yes	Lecturer and above	Male	South America
209	2/16/2012 15:21:34	Statistics, Theory	Biology	5	3	Too low	Yes, at both levels	Yes, at both levels	Merged	40	Probability, Calculus , Linear algebra , Graph theory, Geometry, Other	No	Lecturer and above	Female	North America
210	2/16/2012 15:22:10	Statistics, Decision making	Biology	2	3	Too low	Yes, at both levels	Yes, at both levels	NA	20	Probability, Graph theory	No	PhD student	Female	Europe
211	2/16/2012 15:24:20	Statistics, Decision making	Biology	2	3	Too low	Yes, at both levels	Yes, at both levels	Merged	30	Calculus , Linear algebra , Graph theory	No	PhD student	Female	Europe
212	2/16/2012 15:25:28	Statistics	Biology	2	3	Too low	Yes, at both levels	Yes, at both levels	Merged	30	Linear algebra , Graph theory	No	Other	Female	North America
213	2/16/2012 15:25:41	Statistics, Theory, Decision making	Biology	5	4	Too low	Yes, at both levels	Yes, at both levels	Separated	10	Calculus , Linear algebra , Graph theory	No	Postdoc	Male	Europe
214	2/16/2012 15:25:54	Statistics, Theory, Decision making	Biology	5	3	Just right	Yes, at both levels	No	Separated	10	Calculus , Other	No	Lecturer and above	Male	North America
215	2/16/2012 15:26:51	Statistics, Decision making	Biology	4	1	Too low	Yes, at both levels	Yes, at both levels	Separated	10	Probability, Calculus , Graph theory	No	Lecturer and above	Male	South America
216	2/16/2012 15:31:03	Statistics, Theory, Decision making	Biology	4	4	Too low	Yes, at both levels	Yes, at both levels	Separated	30	Linear algebra	Yes	Other	Male	North America
217	2/16/2012 15:31:23	Statistics	Other	3	4	Just right	Yes, at graduate level	Yes, at both levels	Separated	40	Probability, Calculus , Linear algebra	No	Postdoc	Female	North America
218	2/16/2012 15:32:41	Statistics, Theory	Biology	4	3	Too low	Yes, at undergraduate level	Yes, at both levels	Merged	20	Probability, Linear algebra , Other	No	Lecturer and above	Male	North America
219	2/16/2012 15:33:06	Statistics, Decision making	Biology	2	4	Too low	Yes, at both levels	Yes, at both levels	Separated	40	Graph theory	No	PhD student	Female	North America
220	2/16/2012 15:34:36	Statistics	Other	5	5	Too low	Yes, at undergraduate level	Yes, at undergraduate level	Merged	20	Other	Yes	Postdoc	Female	Europe
221	2/16/2012 15:38:06	Statistics, Decision making	Biology	4	2	Too low	Yes, at both levels	Yes, at both levels	Separated	40	Probability, Calculus , Linear algebra , Geometry	No	Other	Female	North America
222	2/16/2012 15:39:22	Statistics, Decision making	Biology	3	4	Too low	Yes, at both levels	Yes, at both levels	Merged	30	Calculus	No	Lecturer and above	Male	North America
223	2/16/2012 15:39:47	Statistics, Theory	Biology	1	4	Just right	Yes, at both levels	Yes, at both levels	Merged	30	Calculus , Linear algebra	No	PhD student	Female	North America
224	2/16/2012 15:40:13	Statistics, Decision making	Biology	3	1	Too low	Yes, at both levels	Yes, at both levels	Merged	30	Probability	No	PhD student	Female	North America
225	2/16/2012 15:42:22	Theory	Applied or pure mathematics	5	5	Too low	Yes, at both levels	Yes, at both levels	Merged	20	Graph theory	Yes	Postdoc	Female	North America
226	2/16/2012 15:42:36	Statistics	Biology	2	1	Too low	Yes, at both levels	Yes, at both levels	Merged	20	Probability, Linear algebra , Other	No	Postdoc	Male	Europe
227	2/16/2012 15:45:56	Statistics	Biology	2	1	Too low	Yes, at both levels	Yes, at both levels	Separated	70	Calculus , Graph theory	No	NA	Male	Europe
228	2/16/2012 15:46:41	Statistics	Physics	2	3	Too low	Yes, at undergraduate level	Yes, at graduate level	Separated	30	Probability, Calculus , Linear algebra	No	PhD student	Female	Europe
229	2/16/2012 15:48:01	Statistics	Biology	5	3	Too low	Yes, at both levels	Yes, at both levels	Separated	20	NA	Yes	PhD student	Female	North America
230	2/16/2012 15:54:32	Statistics	Physics	4	2	Too low	Yes, at both levels	Yes, at both levels	Merged	20	Graph theory	Yes	Lecturer and above	Male	North America
231	2/16/2012 15:56:56	Statistics	Biology	3	3	Too low	No	Yes, at undergraduate level	Merged	20	Probability	No	PhD student	Female	North America
232	2/16/2012 16:00:07	Statistics	Biology	3	3	Too low	Yes, at graduate level	Yes, at graduate level	Separated	20	Probability, Calculus , Linear algebra , Graph theory	No	PhD student	Female	North America
233	2/16/2012 16:00:12	Statistics, Theory	Other	3	2	Just right	Yes, at both levels	Yes, at undergraduate level	Merged	30	Probability, Calculus , Linear algebra	No	Other	Male	North America
234	2/16/2012 16:00:13	Statistics, Decision making	Biology	4	4	Too low	Yes, at both levels	Yes, at graduate level	Separated	50	Linear algebra , Graph theory	Yes	Other	Female	North America
235	2/16/2012 16:00:55	Statistics	Biology	3	1	Just right	No	Yes, at graduate level	Merged	20	Probability, Linear algebra , Graph theory	Yes	PhD student	Female	North America
236	2/16/2012 16:05:04	Statistics, Theory, Decision making	Biology	3	3	Too low	Yes, at both levels	Yes, at both levels	Separated	30	Probability, Calculus , Geometry	No	Postdoc	Male	North America
237	2/16/2012 16:07:10	Statistics, Theory, Decision making	Applied or pure mathematics	5	5	Too low	Yes, at both levels	Yes, at both levels	Merged	60	NA	Yes	Postdoc	Female	North America
238	2/16/2012 16:07:11	Statistics	Biology	5	4	Too low	No	Yes, at both levels	Merged	30	Probability	No	PhD student	Male	North America
239	2/16/2012 16:10:02	Statistics, Decision making	Biology	3	1	Too high	Yes, at both levels	Yes, at both levels	Merged	30	Probability, Calculus , Linear algebra	No	PhD student	Male	North America
240	2/16/2012 16:10:59	Statistics, Theory, Decision making	Other	3	3	Too low	Yes, at both levels	Yes, at both levels	Separated	20	Probability, Calculus , Linear algebra , Graph theory	No	Other	Male	Europe
241	2/16/2012 16:13:01	Statistics	Biology	4	2	Too low	Yes, at both levels	Yes, at graduate level	Separated	30	Calculus , Linear algebra	No	PhD student	Male	North America
242	2/16/2012 16:16:04	Statistics, Decision making	Other	4	5	Too low	Yes, at graduate level	Yes, at graduate level	Merged	20	Calculus	Yes	PhD student	Male	North America
243	2/16/2012 16:17:20	Statistics	Biology	5	4	Too low	Yes, at both levels	Yes, at both levels	Merged	10	Geometry	Yes	Postdoc	Male	North America
244	2/16/2012 16:18:08	Statistics	Biology	3	1	Just right	Yes, at undergraduate level	Yes, at both levels	Separated	0	Probability, Linear algebra , Graph theory, Geometry	No	Lecturer and above	Male	North America
245	2/16/2012 16:19:48	Statistics	Other	5	3	Too low	Yes, at both levels	No	Separated	20	Probability, Graph theory	Yes	PhD student	Male	North America
246	2/16/2012 16:20:43	Statistics, Theory	Biology	5	4	Too low	Yes, at both levels	Yes, at both levels	Merged	30	Calculus , Linear algebra , Graph theory	No	Postdoc	Male	North America
247	2/16/2012 16:23:58	Statistics, Theory	Biology	5	4	Too low	Yes, at both levels	Yes, at both levels	Merged	20	Linear algebra , Graph theory	No	Lecturer and above	Male	North America
248	2/16/2012 16:26:34	Statistics, Theory	Biology	3	3	Too low	Yes, at undergraduate level	Yes, at both levels	Separated	30	Calculus , Linear algebra	No	PhD student	Female	South America
249	2/16/2012 16:28:15	Statistics	Biology	1	1	Too low	Yes, at both levels	Yes, at both levels	Separated	10	Other	No	Lecturer and above	Female	North America
250	2/16/2012 16:29:35	Statistics	Biology	2	1	Just right	Yes, at graduate level	Yes, at both levels	Merged	40	Probability, Calculus	Yes	Other	Female	North America
251	2/16/2012 16:31:25	Statistics	Biology	3	1	Too low	Yes, at graduate level	Yes, at graduate level	Merged	30	Probability	No	Postdoc	Female	North America
252	2/16/2012 16:34:28	Statistics, Decision making	Biology	3	4	Too low	Yes, at undergraduate level	Yes, at undergraduate level	Merged	50	Probability, Calculus	No	PhD student	Male	North America
253	2/16/2012 16:35:08	Statistics, Decision making	Biology	2	1	Too low	Yes, at undergraduate level	Yes, at both levels	Merged	30	Probability, Calculus , Geometry	No	Other	Female	Asia
254	2/16/2012 16:36:48	Statistics, Theory, Decision making	Applied or pure mathematics	5	4	Just right	No	Yes, at both levels	Merged	30	Graph theory	Yes	Postdoc	Female	North America
255	2/16/2012 16:39:21	Statistics	Biology	2	3	Too low	Yes, at both levels	Yes, at both levels	Merged	40	Probability, Calculus , Linear algebra , Graph theory, Geometry	No	Postdoc	Female	Asia
256	2/16/2012 16:39:30	Statistics, Decision making	Biology	3	3	Just right	No	No	Merged	50	Probability, Calculus , Linear algebra , Geometry	Yes	NA	Male	North America
257	2/16/2012 16:43:21	NA	Biology	2	2	Too low	Yes, at graduate level	Yes, at both levels	Merged	40	Linear algebra	No	Other	Female	North America
258	2/16/2012 16:47:13	Statistics, Theory	Biology	5	3	NA	No	No	Separated	20	Graph theory	Yes	Lecturer and above	Male	North America
259	2/16/2012 16:49:33	Statistics, Theory, Decision making	Biology	5	4	Too low	Yes, at graduate level	Yes, at both levels	Separated	20	Other	Yes	Other	Male	North America
260	2/16/2012 16:51:28	Statistics	Biology	3	3	Too low	Yes, at both levels	Yes, at both levels	Separated	20	Calculus , Linear algebra	No	PhD student	Female	North America
261	2/16/2012 16:54:50	Statistics, Theory, Decision making	Biology	5	5	Too low	Yes, at both levels	Yes, at both levels	Merged	10	Graph theory	Yes	Lecturer and above	NA	NA
262	2/16/2012 16:55:04	Statistics	Biology	4	1	Too low	Yes, at graduate level	Yes, at graduate level	Merged	30	Probability, Calculus , Linear algebra , Geometry, Other	No	Other	Female	North America
263	2/16/2012 16:55:39	Statistics	Biology	3	2	Too low	Yes, at both levels	Yes, at both levels	Merged	20	Probability	No	Other	Male	North America
264	2/16/2012 16:55:44	Statistics	Biology	1	2	Too low	Yes, at both levels	Yes, at both levels	Merged	30	Calculus , Linear algebra	No	Other	Female	North America
265	2/16/2012 16:56:17	Statistics, Theory	Biology	3	2	Just right	Yes, at both levels	Yes, at both levels	Separated	20	Other	No	Other	Male	North America
266	2/16/2012 16:58:02	Statistics	Biology	4	1	Just right	Yes, at undergraduate level	Yes, at both levels	Separated	60	Graph theory	No	Lecturer and above	Male	North America
267	2/16/2012 17:01:29	Statistics	Other	4	2	Too low	Yes, at graduate level	Yes, at both levels	Separated	20	Calculus , Other	Yes	Lecturer and above	Female	North America
268	2/16/2012 17:02:59	Statistics	Biology	3	3	Just right	Yes, at undergraduate level	Yes, at both levels	Merged	30	Linear algebra	No	PhD student	Female	North America
269	2/16/2012 17:05:51	Statistics	Biology	2	3	Too low	Yes, at undergraduate level	Yes, at both levels	Separated	80	Probability, Calculus , Linear algebra , Graph theory, Geometry	No	PhD student	Male	South America
270	2/16/2012 17:07:51	Statistics, Decision making	Biology	5	3	Just right	Yes, at undergraduate level	Yes, at both levels	Separated	10	Probability	Yes	Lecturer and above	Male	North America
271	2/16/2012 17:08:36	Statistics	Biology	2	1	Too low	Yes, at both levels	Yes, at graduate level	Merged	20	Probability, Calculus , Linear algebra , Other	No	Postdoc	Female	North America
272	2/16/2012 17:11:43	Statistics	Biology	3	2	Too low	NA	Yes, at undergraduate level	Merged	30	Linear algebra , Other	No	Other	Male	North America
273	2/16/2012 17:12:12	Statistics, Theory, Decision making	Biology	5	5	Too low	Yes, at both levels	No	Merged	40	Probability, Calculus , Linear algebra	No	PhD student	Male	North America
274	2/16/2012 17:13:29	Statistics, Decision making	Biology	4	3	Too low	Yes, at undergraduate level	Yes, at both levels	Merged	40	Calculus	Yes	PhD student	Male	North America
275	2/16/2012 17:16:52	Statistics, Theory	Biology	4	3	Too low	Yes, at undergraduate level	Yes, at both levels	Merged	30	Calculus , Linear algebra	No	Postdoc	Male	North America
276	2/16/2012 17:21:06	Statistics, Decision making	Biology	1	2	Too low	Yes, at both levels	Yes, at both levels	Merged	20	Calculus , Graph theory	No	Lecturer and above	Female	North America
277	2/16/2012 17:21:16	Statistics, Theory	Biology	5	3	Just right	Yes, at undergraduate level	Yes, at both levels	Merged	20	Probability, Linear algebra	Yes	Lecturer and above	Male	North America
278	2/16/2012 17:23:44	Statistics	Biology	3	2	Too low	Yes, at both levels	Yes, at both levels	Separated	20	Probability	No	PhD student	Male	North America
279	2/16/2012 17:25:50	Statistics	Biology	3	2	Just right	Yes, at both levels	Yes, at both levels	Merged	40	Probability, Calculus , Linear algebra , Graph theory, Geometry	No	Lecturer and above	Female	North America
280	2/16/2012 17:27:23	Statistics, Theory	Physics	5	5	Too low	Yes, at both levels	Yes, at both levels	NA	30	Probability, Linear algebra	Yes	Postdoc	Female	North America
281	2/16/2012 17:29:38	Statistics, Theory	Biology	5	4	Too low	Yes, at both levels	Yes, at both levels	Separated	30	Graph theory	Yes	Lecturer and above	Male	North America
282	2/16/2012 17:33:15	Statistics, Decision making	Biology	5	5	Too low	Yes, at undergraduate level	Yes, at graduate level	Separated	20	Calculus , Linear algebra	Yes	Other	Female	North America
283	2/16/2012 17:33:33	Statistics	Biology	2	3	Too low	Yes, at graduate level	Yes, at both levels	Merged	40	Probability, Graph theory	No	Postdoc	Female	North America
284	2/16/2012 17:36:00	Statistics, Theory	Biology	5	2	Too low	Yes, at both levels	Yes, at both levels	Merged	20	Probability, Linear algebra , Graph theory	No	Other	Female	North America
285	2/16/2012 17:41:45	Statistics	Biology	2	2	Too low	Yes, at both levels	Yes, at both levels	Merged	30	Probability, Calculus , Linear algebra , Graph theory, Geometry	No	PhD student	Female	North America
286	2/16/2012 17:44:25	Statistics	Biology	4	2	Too low	Yes, at undergraduate level	Yes, at both levels	Separated	30	Probability, Graph theory	Yes	PhD student	NA	Europe
287	2/16/2012 17:47:15	Statistics, Theory	Biology	5	5	Too low	Yes, at both levels	Yes, at both levels	Merged	30	Probability, Graph theory	Yes	Postdoc	Male	Europe
288	2/16/2012 17:47:23	Statistics, Theory	Biology	3	3	Too low	Yes, at both levels	Yes, at undergraduate level	Separated	20	Calculus , Linear algebra , Graph theory, Geometry	No	PhD student	Female	North America
289	2/16/2012 17:48:44	Statistics	Biology	5	5	Just right	No	Yes, at both levels	Separated	20	NA	Yes	Postdoc	Female	North America
290	2/16/2012 17:51:38	Statistics, Decision making	Biology	5	5	Too low	Yes, at undergraduate level	Yes, at undergraduate level	Separated	20	Graph theory	Yes	PhD student	Male	North America
291	2/16/2012 17:54:34	Statistics, Theory	Biology	3	2	Too low	Yes, at both levels	Yes, at both levels	Merged	20	Calculus	No	Postdoc	Male	Europe
292	2/16/2012 17:57:58	Statistics, Theory	Biology	4	4	Too low	Yes, at both levels	Yes, at both levels	Separated	20	Graph theory	Yes	Lecturer and above	Female	North America
293	2/16/2012 17:59:58	Statistics, Theory	Biology	4	3	Too low	Yes, at both levels	Yes, at both levels	Merged	60	Probability, Calculus , Linear algebra	No	Lecturer and above	Male	North America
294	2/16/2012 18:01:37	Statistics, Theory	Applied or pure mathematics	5	4	Too low	Yes, at both levels	Yes, at graduate level	Merged	20	Probability, Calculus , Linear algebra , Geometry	No	Lecturer and above	Male	North America
295	2/16/2012 18:08:41	Statistics, Theory	Biology	4	4	Just right	Yes, at undergraduate level	Yes, at both levels	Merged	30	NA	Yes	Postdoc	Male	North America
296	2/16/2012 18:13:15	Statistics, Decision making	Biology	3	3	Too low	No	Yes, at both levels	Separated	20	Probability	No	Postdoc	Male	North America
297	2/16/2012 18:17:32	Statistics, Theory	Biology	4	3	Too low	Yes, at both levels	Yes, at both levels	Separated	40	Probability, Calculus , Linear algebra , Graph theory	No	PhD student	Male	North America
298	2/16/2012 18:20:17	Statistics	Biology	5	2	Too low	Yes, at both levels	Yes, at both levels	Merged	50	Linear algebra , Graph theory	No	Postdoc	NA	Australia and New Zealand
299	2/16/2012 18:20:43	Statistics	Biology	2	3	Too low	Yes, at graduate level	Yes, at undergraduate level	Separated	30	Calculus , Linear algebra	No	Other	Female	North America
300	2/16/2012 18:31:36	Statistics	Biology	3	2	Just right	Yes, at both levels	Yes, at graduate level	Merged	20	NA	No	PhD student	Male	North America
301	2/16/2012 18:31:48	Statistics	Biology	3	3	Just right	No	Yes, at both levels	Separated	0	Probability	No	Lecturer and above	Female	Europe
302	2/16/2012 18:32:31	Statistics	Biology	1	4	Too low	Yes, at both levels	Yes, at both levels	Merged	0	Probability, Calculus , Linear algebra , Graph theory, Geometry	No	PhD student	Female	North America
303	2/16/2012 18:34:30	Statistics, Theory, Decision making	Applied or pure mathematics	5	4	Too low	Yes, at both levels	Yes, at both levels	Merged	30	Graph theory, Geometry	Yes	Lecturer and above	Male	North America
304	2/16/2012 18:35:21	Statistics	Biology	3	1	Too low	Yes, at both levels	Yes, at both levels	Merged	10	Probability, Calculus , Linear algebra , Graph theory, Geometry	Yes	Other	Female	North America
305	2/16/2012 18:35:30	Statistics	Biology	4	5	Too low	Yes, at undergraduate level	Yes, at both levels	Merged	30	Calculus , Graph theory	No	Other	NA	North America
306	2/16/2012 18:35:41	Statistics	Biology	3	2	Too low	Yes, at both levels	Yes, at both levels	Merged	0	Probability, Calculus , Linear algebra , Graph theory	No	PhD student	Female	North America
307	2/16/2012 18:39:50	Decision making	Biology	1	1	Too low	Yes, at graduate level	Yes, at graduate level	Merged	20	Probability, Calculus , Linear algebra , Graph theory	No	Postdoc	Male	North America
308	2/16/2012 18:41:33	Statistics, Theory	Biology	5	4	Too low	Yes, at both levels	Yes, at both levels	Separated	60	Graph theory	Yes	Other	Female	North America
309	2/16/2012 19:02:56	Statistics	Biology	2	2	Too low	Yes, at both levels	Yes, at graduate level	Merged	20	Probability, Linear algebra	No	PhD student	Female	North America
310	2/16/2012 19:07:51	Statistics	Other	4	2	Too low	Yes, at undergraduate level	Yes, at both levels	Separated	30	Calculus , Linear algebra	No	Other	Female	North America
311	2/16/2012 19:11:53	Statistics, Theory	Biology	5	5	Too low	Yes, at both levels	Yes, at both levels	Merged	50	Probability, Graph theory	No	PhD student	Female	North America
312	2/16/2012 19:13:30	Statistics	Other	1	4	Too low	Yes, at both levels	Yes, at both levels	NA	50	Probability, Calculus , Other	No	Other	Female	North America
313	2/16/2012 19:21:56	Statistics, Theory, Decision making	Biology	4	5	Too low	Yes, at graduate level	Yes, at both levels	Merged	20	Probability, Calculus , Linear algebra , Graph theory	No	Postdoc	Male	North America
314	2/16/2012 19:25:56	Statistics, Theory	Biology	3	4	Too low	Yes, at undergraduate level	Yes, at undergraduate level	Separated	30	Probability, Calculus	No	PhD student	Male	Europe
315	2/16/2012 19:38:48	Statistics, Theory	Biology	3	2	Just right	Yes, at both levels	Yes, at both levels	Merged	40	Probability, Graph theory	No	PhD student	Female	North America
316	2/16/2012 19:46:48	Statistics, Theory	Biology	5	4	Just right	Yes, at both levels	Yes, at both levels	Merged	20	NA	Yes	Postdoc	Female	North America
317	2/16/2012 19:53:11	Statistics, Theory, Decision making	Biology	4	4	Too low	Yes, at both levels	Yes, at both levels	Merged	0	Probability	Yes	Lecturer and above	Male	North America
318	2/16/2012 19:56:14	Statistics, Theory	Biology	5	3	Too low	Yes, at both levels	Yes, at both levels	Separated	50	Probability	No	PhD student	Female	North America
319	2/16/2012 19:59:09	NA	Other	3	1	Just right	No	No	Separated	10	NA	No	Postdoc	Female	North America
320	2/16/2012 20:11:52	Statistics, Theory, Decision making	Biology	3	4	Too low	Yes, at graduate level	Yes, at both levels	Merged	20	Calculus	No	PhD student	Female	North America
321	2/16/2012 20:13:06	Statistics	Biology	5	3	Too low	Yes, at both levels	Yes, at both levels	Separated	30	Calculus , Graph theory	No	PhD student	Female	Asia
322	2/16/2012 20:15:06	Statistics, Decision making	Biology	5	3	Just right	Yes, at undergraduate level	Yes, at undergraduate level	Merged	20	Calculus , Linear algebra	No	Lecturer and above	Male	North America
323	2/16/2012 20:24:21	Statistics	Biology	4	5	Too low	Yes, at undergraduate level	Yes, at both levels	Merged	20	Probability, Calculus , Linear algebra	No	Other	Male	North America
324	2/16/2012 20:38:31	Statistics	Other	4	2	Too low	Yes, at both levels	Yes, at both levels	Merged	20	Calculus , Linear algebra , Graph theory	No	PhD student	Male	North America
325	2/16/2012 20:42:39	Statistics, Theory	Biology	4	4	Just right	Yes, at both levels	No	Merged	20	Probability	Yes	PhD student	Female	North America
326	2/16/2012 20:52:26	Statistics	Biology	3	3	Too low	Yes, at graduate level	Yes, at graduate level	Separated	30	Probability, Calculus , Graph theory	No	Other	Female	South America
327	2/16/2012 21:01:23	Statistics, Theory	Biology	5	4	NA	NA	Yes, at both levels	Separated	0	NA	Yes	Lecturer and above	Male	North America
328	2/16/2012 21:04:35	Statistics, Theory	Biology	4	2	Too low	Yes, at undergraduate level	Yes, at both levels	Separated	20	Probability, Linear algebra , Graph theory	Yes	Other	Female	North America
329	2/16/2012 21:08:48	Statistics	Biology	2	4	Too low	Yes, at both levels	Yes, at both levels	Merged	50	Probability, Calculus , Linear algebra , Graph theory, Geometry, Other	No	PhD student	Female	North America
330	2/16/2012 21:10:04	Statistics, Theory	Biology	5	4	Too low	Yes, at both levels	Yes, at both levels	Merged	50	Linear algebra , Graph theory, Geometry	No	Postdoc	Male	North America
331	2/16/2012 21:10:11	Statistics	Biology	3	1	Too low	Yes, at graduate level	Yes, at both levels	Merged	20	Calculus	No	PhD student	Male	South America
332	2/16/2012 21:10:40	Statistics, Theory, Decision making	Biology	5	3	Too low	Yes, at both levels	Yes, at graduate level	Merged	30	Linear algebra , Graph theory	Yes	Postdoc	Male	North America
333	2/16/2012 21:11:36	Statistics	Biology	3	4	Too low	Yes, at both levels	Yes, at both levels	Merged	30	Calculus , Linear algebra	No	PhD student	Male	Australia and New Zealand
334	2/16/2012 21:13:15	Statistics	Biology	3	1	Just right	Yes, at both levels	Yes, at both levels	Separated	30	Calculus , Linear algebra , Graph theory	No	Other	Female	North America
335	2/16/2012 21:14:11	Statistics, Theory, Decision making	Biology	5	5	Too low	Yes, at both levels	Yes, at both levels	Separated	30	Other	Yes	Lecturer and above	Male	North America
336	2/16/2012 21:15:21	Statistics	Biology	3	1	Too low	Yes, at both levels	Yes, at both levels	Merged	40	Calculus , Linear algebra , Graph theory	No	PhD student	Male	North America
337	2/16/2012 21:15:52	Statistics	Biology	1	2	Too low	Yes, at undergraduate level	Yes, at both levels	Separated	30	Probability, Graph theory, Geometry	No	Other	Male	South America
338	2/16/2012 21:17:50	Statistics, Decision making	Applied or pure mathematics	5	5	Just right	Yes, at both levels	Yes, at both levels	Separated	20	Graph theory	Yes	Lecturer and above	Male	Europe
339	2/16/2012 21:29:08	Statistics, Decision making	Biology	3	3	Just right	Yes, at both levels	Yes, at both levels	Merged	30	Graph theory	No	PhD student	Female	North America
340	2/16/2012 21:30:58	NA	Other	5	1	Too low	Yes, at both levels	Yes, at both levels	Separated	30	Probability, Calculus , Linear algebra , Graph theory, Geometry	No	Other	Male	North America
341	2/16/2012 21:36:19	Statistics, Theory	Other	5	4	Too low	Yes, at both levels	Yes, at both levels	Separated	30	Graph theory, Other	No	PhD student	Female	North America
342	2/16/2012 22:00:35	Statistics	Other	4	1	Too low	Yes, at both levels	Yes, at both levels	NA	30	Probability, Calculus , Linear algebra	No	Lecturer and above	Male	North America
343	2/16/2012 22:01:10	Statistics, Theory	Biology	5	3	Just right	Yes, at both levels	Yes, at both levels	Merged	40	Calculus	No	Lecturer and above	Male	North America
344	2/16/2012 22:11:23	NA	Other	2	1	Too low	Yes, at undergraduate level	Yes, at undergraduate level	Separated	40	Calculus , Graph theory	No	Other	Male	North America
345	2/16/2012 22:13:47	Statistics, Theory	Biology	4	2	Just right	Yes, at both levels	Yes, at both levels	Merged	30	Probability, Other	Yes	PhD student	Male	Europe
346	2/16/2012 22:14:44	Statistics, Theory	Biology	3	4	Too low	No	Yes, at both levels	Separated	30	Probability	No	Lecturer and above	Male	Australia and New Zealand
347	2/16/2012 22:18:59	Statistics, Decision making	Biology	2	3	Too low	Yes, at graduate level	Yes, at graduate level	Merged	70	Probability, Calculus , Linear algebra	No	PhD student	Female	South America
348	2/16/2012 22:21:03	Statistics, Theory, Decision making	Biology	5	4	Too low	Yes, at both levels	No	Merged	30	Calculus , Linear algebra	Yes	PhD student	Female	North America
349	2/16/2012 22:21:26	Statistics, Theory, Decision making	Biology	5	4	Too low	Yes, at both levels	No	Merged	30	Calculus , Linear algebra	Yes	PhD student	Female	North America
350	2/16/2012 22:25:21	Statistics, Theory	Other	4	3	Too low	Yes, at both levels	Yes, at both levels	Merged	10	Probability	Yes	Postdoc	Male	North America
351	2/16/2012 22:33:02	Statistics, Theory	Biology	4	3	Too low	Yes, at both levels	Yes, at both levels	Merged	40	Probability, Calculus , Linear algebra	No	Postdoc	Male	Australia and New Zealand
352	2/16/2012 22:46:30	Decision making	Other	2	2	Too high	Yes, at both levels	Yes, at both levels	Separated	10	Probability, Linear algebra , Geometry	No	Other	Male	North America
353	2/16/2012 22:58:53	Statistics	Biology	2	2	Just right	Yes, at both levels	Yes, at both levels	Merged	30	Probability, Linear algebra , Graph theory, Geometry	Yes	PhD student	Male	South America
354	2/16/2012 23:10:26	Statistics	Biology	2	3	Too low	Yes, at both levels	Yes, at both levels	Merged	30	Calculus , Graph theory	No	Postdoc	Female	North America
355	2/16/2012 23:14:16	Statistics, Theory	Biology	4	3	Too low	NA	Yes, at both levels	Separated	50	Probability, Linear algebra , Graph theory	No	PhD student	Female	North America
356	2/16/2012 23:17:41	Statistics, Theory	Physics	5	5	Too low	Yes, at both levels	Yes, at both levels	Merged	30	Other	Yes	Lecturer and above	Male	North America
357	2/16/2012 23:19:22	Statistics, Theory, Decision making	Biology	4	5	Too low	Yes, at both levels	Yes, at both levels	Merged	30	Graph theory	No	Other	Female	North America
358	2/16/2012 23:23:07	Statistics, Theory	Biology	4	4	Just right	Yes, at undergraduate level	Yes, at both levels	Merged	30	Graph theory	Yes	Postdoc	Male	North America
359	2/16/2012 23:31:10	Statistics, Theory	Biology	4	4	Too low	Yes, at both levels	No	Merged	20	Probability, Calculus , Linear algebra , Graph theory, Geometry, Other	No	Postdoc	Female	Europe
360	2/16/2012 23:34:09	Statistics, Theory, Decision making	Physics	5	5	Just right	Yes, at both levels	Yes, at both levels	Merged	30	Probability, Linear algebra , Graph theory, Geometry, Other	No	PhD student	Male	North America
361	2/16/2012 23:48:06	Statistics, Theory, Decision making	Biology	5	5	Just right	No	No	Merged	20	Probability, Linear algebra , Graph theory	Yes	PhD student	Male	North America
362	2/17/2012 0:07:44	Theory, Decision making	Applied or pure mathematics	4	5	Too low	Yes, at both levels	Yes, at both levels	Merged	50	Probability, Calculus , Linear algebra	Yes	Postdoc	Male	Asia
363	2/17/2012 0:07:52	Statistics, Decision making	Biology	4	5	Too low	Yes, at undergraduate level	Yes, at undergraduate level	Merged	20	Graph theory	No	Other	Male	Australia and New Zealand
364	2/17/2012 0:10:40	Statistics, Theory	Other	4	2	Too low	Yes, at both levels	Yes, at both levels	Merged	40	Probability, Linear algebra , Graph theory	No	PhD student	Female	North America
365	2/17/2012 0:11:45	Statistics	Other	2	4	Just right	Yes, at undergraduate level	Yes, at both levels	Merged	20	Calculus , Linear algebra , Geometry	No	Other	Female	Australia and New Zealand
366	2/17/2012 0:15:18	Statistics, Decision making	Biology	3	4	Just right	No	Yes, at graduate level	Separated	20	Other	No	Other	Male	Australia and New Zealand
367	2/17/2012 0:23:11	Statistics	Other	3	2	Just right	Yes, at both levels	Yes, at graduate level	Merged	20	Calculus , Graph theory	No	PhD student	Female	North America
368	2/17/2012 0:29:46	Theory	Biology	5	5	Too low	Yes, at undergraduate level	Yes, at graduate level	Merged	30	NA	Yes	Postdoc	Female	North America
369	2/17/2012 0:35:36	Statistics	Biology	2	1	Too low	Yes, at both levels	Yes, at both levels	Merged	20	Probability, Calculus , Linear algebra , Graph theory, Geometry	No	Other	Male	Australia and New Zealand
370	2/17/2012 0:51:43	Statistics	Biology	3	2	Too low	Yes, at both levels	Yes, at both levels	Merged	30	Probability	No	Other	Female	North America
371	2/17/2012 1:00:20	Statistics, Theory	Biology	5	3	Too low	Yes, at graduate level	Yes, at graduate level	Merged	40	Calculus , Linear algebra	No	PhD student	Female	North America
372	2/17/2012 1:22:12	Theory	Physics	5	5	Too low	Yes, at both levels	Yes, at both levels	Separated	20	NA	Yes	Lecturer and above	Female	North America
373	2/17/2012 1:31:11	Statistics	Biology	1	1	Too low	Yes, at graduate level	Yes, at graduate level	Separated	20	Linear algebra	No	Postdoc	Female	Australia and New Zealand
374	2/17/2012 1:32:52	Statistics, Decision making	Biology	3	3	Too low	Yes, at both levels	Yes, at both levels	Separated	40	Probability, Calculus , Linear algebra , Other	No	PhD student	Female	North America
375	2/17/2012 1:45:44	Statistics	Biology	2	1	Too low	Yes, at graduate level	Yes, at both levels	Merged	20	Graph theory, Geometry	No	Lecturer and above	Female	North America
376	2/17/2012 2:01:48	Statistics, Theory	Other	5	5	Too low	Yes, at both levels	Yes, at both levels	Separated	20	Probability, Graph theory, Geometry	No	Postdoc	Male	North America
377	2/17/2012 2:22:22	Statistics, Decision making	Biology	3	3	Too low	Yes, at undergraduate level	Yes, at both levels	Merged	30	Probability	Yes	Postdoc	Female	North America
378	2/17/2012 2:43:17	Statistics, Theory	Biology	5	5	Too low	Yes, at both levels	Yes, at both levels	Separated	30	Geometry, Other	Yes	Lecturer and above	Male	Europe
379	2/17/2012 2:50:24	Statistics, Decision making	Biology	NA	NA	Too low	Yes, at both levels	Yes, at both levels	Separated	30	NA	Yes	Other	Male	North America
380	2/17/2012 3:02:10	Statistics	Other	3	4	Too low	Yes, at both levels	Yes, at both levels	Separated	30	Calculus , Linear algebra , Graph theory	No	PhD student	Female	North America
381	2/17/2012 3:04:33	Statistics	Biology	4	4	Too low	Yes, at both levels	Yes, at both levels	Merged	30	Calculus , Graph theory, Other	No	PhD student	Female	North America
382	2/17/2012 3:20:28	Statistics	Biology	4	2	Too low	Yes, at undergraduate level	Yes, at both levels	Separated	30	Graph theory	Yes	PhD student	Female	Australia and New Zealand
383	2/17/2012 3:24:21	Statistics, Theory, Decision making	Biology	3	4	Too low	Yes, at both levels	Yes, at both levels	Separated	20	Probability, Calculus , Linear algebra , Graph theory	No	PhD student	Male	North America
384	2/17/2012 3:27:13	Statistics, Theory	Biology	3	2	Too low	Yes, at both levels	Yes, at both levels	Merged	30	Calculus , Graph theory, Geometry, Other	No	Lecturer and above	Male	North America
385	2/17/2012 3:31:06	Statistics	Biology	2	3	Too low	Yes, at undergraduate level	Yes, at both levels	NA	20	Probability, Calculus , Linear algebra , Graph theory, Geometry	No	PhD student	Male	Australia and New Zealand
386	2/17/2012 3:37:14	Statistics, Theory	Biology	2	3	Too low	Yes, at both levels	Yes, at both levels	Merged	70	Probability, Calculus , Linear algebra	No	PhD student	Female	Asia
387	2/17/2012 3:41:02	Statistics	Other	3	2	Just right	Yes, at graduate level	Yes, at both levels	Separated	0	Probability, Linear algebra	No	Other	Female	North America
388	2/17/2012 3:42:58	Statistics	Biology	5	4	Too low	Yes, at graduate level	Yes, at graduate level	Merged	30	NA	No	PhD student	Male	Asia
389	2/17/2012 3:45:14	Statistics	Biology	3	3	Too high	Yes, at both levels	Yes, at both levels	Merged	30	Calculus , Graph theory	No	PhD student	Male	Asia
390	2/17/2012 3:52:39	Statistics	Biology	2	3	Too low	Yes, at both levels	Yes, at both levels	Merged	30	Calculus	No	PhD student	Male	Asia
391	2/17/2012 3:59:39	Statistics	Biology	4	4	Just right	Yes, at undergraduate level	Yes, at both levels	Separated	40	Graph theory	No	PhD student	Male	Europe
392	2/17/2012 3:59:46	Statistics	Biology	1	3	Too low	No	Yes, at both levels	Merged	30	Probability, Calculus , Linear algebra , Graph theory	No	Postdoc	Male	Asia
393	2/17/2012 4:06:06	Statistics	Biology	NA	2	Too low	Yes, at both levels	Yes, at both levels	Separated	10	Probability, Calculus , Graph theory, Other	Yes	Other	Male	Asia
394	2/17/2012 4:17:07	Statistics, Theory, Decision making	Biology	4	3	Too low	Yes, at both levels	Yes, at both levels	Merged	30	Probability, Calculus , Linear algebra , Graph theory	No	Other	Male	Asia
395	2/17/2012 4:18:41	Statistics, Theory	Biology	2	2	Too low	Yes, at graduate level	Yes, at both levels	Merged	30	Calculus , Linear algebra , Graph theory, Other	No	PhD student	Male	North America
396	2/17/2012 4:25:18	Statistics	Biology	4	2	Just right	Yes, at both levels	Yes, at both levels	Merged	30	Probability, Graph theory, Other	No	PhD student	Female	Asia
397	2/17/2012 4:31:11	Statistics, Theory	Biology	2	4	Too low	Yes, at both levels	Yes, at undergraduate level	Separated	40	Probability, Calculus , Graph theory	No	Other	Male	Asia
398	2/17/2012 4:40:01	Statistics	Biology	3	4	Too low	Yes, at both levels	Yes, at both levels	Merged	20	Probability, Linear algebra , Geometry	No	PhD student	Female	Australia and New Zealand
399	2/17/2012 4:40:40	Statistics	Biology	4	3	Too low	Yes, at both levels	Yes, at both levels	Merged	30	Calculus , Linear algebra	No	PhD student	Female	Asia
400	2/17/2012 4:59:40	Statistics	Biology	3	3	Too low	Yes, at both levels	Yes, at both levels	Merged	20	Linear algebra , Graph theory	No	PhD student	Female	Asia
401	2/17/2012 5:11:28	Statistics, Theory, Decision making	Biology	5	4	Just right	Yes, at both levels	Yes, at both levels	Separated	40	Probability, Calculus , Linear algebra , Graph theory, Geometry	No	Lecturer and above	Male	Asia
402	2/17/2012 5:22:06	Decision making	Other	4	4	Too low	Yes, at graduate level	Yes, at graduate level	Merged	10	Other	Yes	Lecturer and above	Male	Asia
403	2/17/2012 5:26:03	Statistics, Theory, Decision making	Biology	5	4	Too low	Yes, at both levels	Yes, at both levels	Merged	40	Calculus , Linear algebra	No	PhD student	Male	Asia
404	2/17/2012 5:28:52	NA	Biology	3	1	Too low	Yes, at both levels	Yes, at both levels	Merged	30	Probability, Calculus	No	Other	Female	Asia
405	2/17/2012 5:36:36	Statistics	Biology	1	1	Just right	Yes, at both levels	Yes, at both levels	Separated	50	Graph theory, Other	No	Other	Female	Asia
406	2/17/2012 5:51:08	Statistics, Theory, Decision making	Biology	2	2	Too low	Yes, at both levels	Yes, at both levels	Separated	40	Probability, Calculus , Graph theory, Geometry, Other	No	Other	Male	Asia
407	2/17/2012 6:00:54	Statistics	Biology	2	1	Too low	Yes, at both levels	Yes, at both levels	Merged	30	Probability, Calculus	No	PhD student	Female	Asia
408	2/17/2012 6:08:02	Theory	Biology	5	5	Too low	Yes, at both levels	Yes, at both levels	Merged	30	NA	Yes	PhD student	Female	North America
409	2/17/2012 6:14:12	Statistics	Other	2	2	Too low	Yes, at both levels	Yes, at both levels	Merged	50	Probability, Calculus , Linear algebra , Graph theory	No	PhD student	Male	NA
410	2/17/2012 6:19:58	Statistics	Biology	3	3	Too low	No	Yes, at graduate level	Separated	30	Probability	No	Other	Male	Asia
411	2/17/2012 6:20:16	Statistics	Biology	3	3	Too low	Yes, at both levels	Yes, at both levels	Merged	40	Probability, Graph theory	No	PhD student	Female	North America
412	2/17/2012 6:21:16	Statistics	Biology	3	3	Just right	Yes, at both levels	Yes, at both levels	Merged	70	Calculus , Linear algebra , Graph theory	No	PhD student	Male	Asia
413	2/17/2012 6:27:11	Statistics, Decision making	Biology	4	2	Just right	Yes, at both levels	Yes, at both levels	Merged	20	Probability, Calculus , Linear algebra , Graph theory	No	PhD student	Female	North America
414	2/17/2012 6:32:39	Statistics	Biology	2	1	Too low	No	Yes, at both levels	Separated	30	Probability	No	PhD student	Male	Asia
415	2/17/2012 6:33:25	Statistics	Other	2	3	Too low	Yes, at both levels	Yes, at both levels	Merged	40	Probability, Calculus , Linear algebra , Graph theory	No	PhD student	Female	North America
416	2/17/2012 6:35:17	Statistics, Theory	Biology	5	5	Too low	Yes, at both levels	Yes, at graduate level	Separated	40	Graph theory	Yes	PhD student	Male	North America
417	2/17/2012 6:41:18	NA	Biology	1	1	Just right	Yes, at both levels	Yes, at both levels	Separated	30	Probability, Calculus , Geometry	No	Lecturer and above	Female	Asia
418	2/17/2012 6:57:02	NA	Biology	3	1	Too low	Yes, at both levels	Yes, at both levels	Separated	10	Calculus , Graph theory, Geometry	No	Other	Male	Asia
419	2/17/2012 7:03:25	Statistics	Biology	4	1	NA	Yes, at both levels	Yes, at graduate level	Merged	20	Probability, Linear algebra , Graph theory	No	PhD student	Male	Asia
420	2/17/2012 7:17:56	Statistics	Other	5	1	Just right	Yes, at both levels	No	Merged	30	Probability, Calculus , Linear algebra , Geometry	No	PhD student	Male	Asia
421	2/17/2012 7:19:36	Statistics, Theory	Biology	5	5	Too low	Yes, at both levels	Yes, at both levels	Merged	0	NA	Yes	PhD student	Male	Asia
422	2/17/2012 7:29:29	Statistics	Biology	3	3	Too low	Yes, at graduate level	Yes, at graduate level	Separated	10	Calculus , Graph theory	No	Other	Female	Asia
423	2/17/2012 7:42:25	Statistics, Theory, Decision making	Biology	4	4	Too low	Yes, at both levels	Yes, at both levels	Merged	30	Linear algebra , Graph theory, Other	Yes	PhD student	Male	North America
424	2/17/2012 7:51:43	Statistics	Biology	2	2	Just right	Yes, at both levels	Yes, at both levels	Separated	30	Probability, Calculus	No	PhD student	Female	Asia
425	2/17/2012 7:53:06	Statistics	Biology	2	1	Too low	Yes, at graduate level	Yes, at both levels	Merged	30	Calculus , Linear algebra , Graph theory	No	PhD student	Female	North America
426	2/17/2012 8:09:03	Statistics	Biology	4	2	Too low	Yes, at both levels	Yes, at both levels	Separated	70	Probability, Calculus , Linear algebra , Graph theory, Geometry	No	Postdoc	Male	North America
427	2/17/2012 8:11:57	Decision making	Biology	3	4	Too low	Yes, at both levels	Yes, at both levels	Merged	40	Probability	No	PhD student	Female	Asia
428	2/17/2012 8:17:52	Statistics	Biology	1	4	Too low	Yes, at graduate level	Yes, at both levels	Merged	70	Probability, Calculus , Linear algebra , Graph theory, Geometry, Other	No	PhD student	Female	Asia
429	2/17/2012 8:36:02	Statistics, Theory	Biology	4	2	Too low	Yes, at both levels	Yes, at both levels	Merged	40	Probability, Calculus , Linear algebra , Graph theory, Other	No	PhD student	Male	Africa
430	2/17/2012 8:36:03	Statistics, Theory, Decision making	Biology	4	5	Too low	Yes, at both levels	Yes, at both levels	Merged	20	Probability, Calculus , Linear algebra , Graph theory, Geometry	No	PhD student	Female	North America
431	2/17/2012 8:37:08	Statistics, Theory	Biology	5	3	Just right	Yes, at both levels	Yes, at both levels	Merged	30	Linear algebra , Graph theory	No	Other	Female	NA
432	2/17/2012 8:44:47	Statistics	Biology	2	2	Too low	No	Yes, at graduate level	Separated	30	Probability, Calculus , Graph theory	Yes	PhD student	Male	Asia
433	2/17/2012 8:51:41	Statistics	Biology	3	4	Just right	Yes, at both levels	Yes, at both levels	Merged	20	Calculus , Graph theory	No	PhD student	Male	Asia
434	2/17/2012 9:03:55	Statistics, Theory	Biology	2	4	Too low	Yes, at both levels	Yes, at both levels	Separated	30	Probability, Calculus , Linear algebra	No	PhD student	Female	Europe
435	2/17/2012 9:05:40	Statistics	Biology	4	2	Too low	Yes, at both levels	Yes, at both levels	Separated	10	Linear algebra , Graph theory	No	Lecturer and above	NA	Europe
436	2/17/2012 9:09:39	Statistics, Theory	Biology	3	5	Too low	Yes, at undergraduate level	Yes, at both levels	Merged	40	Probability, Calculus , Linear algebra , Graph theory, Geometry	Yes	Postdoc	Male	Europe
437	2/17/2012 9:26:09	NA	Biology	3	4	Too low	No	Yes, at both levels	Merged	30	Probability	No	Other	Male	Asia
438	2/17/2012 9:31:11	Statistics	Biology	5	3	Too low	Yes, at both levels	Yes, at both levels	Separated	70	Probability, Calculus	Yes	PhD student	Male	Asia
439	2/17/2012 9:39:02	Statistics	Biology	3	2	Just right	Yes, at undergraduate level	Yes, at both levels	Merged	20	Probability, Calculus , Linear algebra , Graph theory, Geometry	No	PhD student	Male	Europe
440	2/17/2012 9:50:34	Theory	Biology	3	4	Just right	No	No	Merged	70	Calculus , Other	Yes	Other	Male	Asia
441	2/17/2012 9:59:47	Statistics	Biology	4	3	Too low	Yes, at undergraduate level	Yes, at both levels	Merged	30	Probability, Calculus , Linear algebra	No	Other	Female	Europe
442	2/17/2012 10:03:24	Statistics, Theory	Biology	4	NA	Too low	Yes, at both levels	Yes, at undergraduate level	Merged	30	Probability, Linear algebra , Graph theory	NA	Other	Male	Asia
443	2/17/2012 10:06:35	Statistics	Other	2	4	Just right	Yes, at graduate level	Yes, at both levels	Separated	30	Calculus , Linear algebra , Graph theory	No	Postdoc	Male	Europe
444	2/17/2012 10:18:22	Statistics, Decision making	Biology	2	3	Just right	Yes, at both levels	Yes, at graduate level	Merged	20	Probability, Calculus , Graph theory	No	PhD student	Male	Asia
445	2/17/2012 10:19:21	Statistics	Biology	3	2	Too low	Yes, at undergraduate level	Yes, at both levels	Merged	30	Probability, Calculus , Linear algebra	No	Postdoc	Female	Europe
446	2/17/2012 10:19:46	Statistics	Biology	2	1	Too low	Yes, at both levels	Yes, at both levels	Separated	30	Probability, Calculus	No	Other	Female	Asia
447	2/17/2012 10:40:29	Statistics	Biology	4	4	Too low	Yes, at both levels	Yes, at graduate level	Merged	10	Linear algebra , Graph theory, Geometry	No	Lecturer and above	Male	Europe
448	2/17/2012 10:51:25	Statistics, Decision making	Biology	1	1	Too low	Yes, at both levels	Yes, at undergraduate level	Merged	20	Probability, Graph theory	No	Other	Female	Europe
449	2/17/2012 10:52:57	Statistics	Biology	4	2	Just right	No	Yes, at graduate level	Merged	20	Calculus	No	PhD student	Male	Europe
450	2/17/2012 11:02:52	Statistics	Biology	1	3	Just right	Yes, at graduate level	Yes, at graduate level	Separated	30	Calculus , Linear algebra	Yes	PhD student	Female	Europe
451	2/17/2012 11:17:33	Statistics	Biology	3	5	Too low	Yes, at both levels	Yes, at both levels	Separated	70	Probability, Calculus	No	PhD student	Female	Asia
452	2/17/2012 11:18:10	Statistics, Theory	Biology	4	2	Too low	Yes, at both levels	Yes, at both levels	Merged	10	Probability, Calculus , Linear algebra , Graph theory, Geometry	No	Other	Female	Europe
453	2/17/2012 11:26:26	Statistics	Biology	4	2	Too low	Yes, at graduate level	Yes, at both levels	Separated	30	Calculus , Graph theory	No	Other	Male	Europe
454	2/17/2012 12:13:46	Statistics, Decision making	Biology	5	3	Just right	Yes, at both levels	Yes, at undergraduate level	Separated	30	Other	Yes	Lecturer and above	Male	North America
455	2/17/2012 12:27:00	Statistics, Theory	Biology	4	4	Too low	Yes, at undergraduate level	Yes, at both levels	Merged	0	Probability, Linear algebra	No	Postdoc	Female	North America
456	2/17/2012 12:43:11	Theory	Physics	5	4	Just right	Yes, at both levels	Yes, at both levels	Separated	60	Probability, Calculus , Linear algebra	Yes	PhD student	Male	South America
457	2/17/2012 12:43:33	Statistics	Biology	5	4	Too low	Yes, at undergraduate level	Yes, at graduate level	Merged	30	Linear algebra	Yes	PhD student	Male	North America
458	2/17/2012 13:16:28	Statistics, Decision making	Biology	4	4	Too low	Yes, at graduate level	Yes, at graduate level	Merged	40	Calculus , Linear algebra , Graph theory, Geometry	No	Postdoc	Male	Asia
459	2/17/2012 13:22:28	Decision making	Biology	1	2	Too low	Yes, at graduate level	Yes, at both levels	Separated	40	Probability	No	Other	Female	Asia
460	2/17/2012 13:35:08	Statistics	Biology	3	2	Too low	Yes, at graduate level	Yes, at graduate level	Merged	20	Probability, Graph theory, Geometry	No	PhD student	Male	Asia
461	2/17/2012 13:47:37	Statistics	Biology	1	4	Just right	Yes, at undergraduate level	Yes, at undergraduate level	Merged	20	Graph theory, Geometry	Yes	Other	Male	Asia
462	2/17/2012 13:53:07	Statistics, Theory	Biology	5	5	Too low	Yes, at both levels	Yes, at both levels	Merged	40	Graph theory, Geometry	No	PhD student	Male	North America
463	2/17/2012 13:56:34	Statistics, Theory	Biology	4	4	Too low	Yes, at both levels	Yes, at both levels	Merged	40	Linear algebra	No	PhD student	Female	North America
464	2/17/2012 13:59:06	Statistics, Decision making	Biology	4	3	Too low	Yes, at graduate level	Yes, at both levels	Merged	50	Probability, Graph theory	No	Postdoc	Female	North America
465	2/17/2012 14:06:11	Statistics, Theory	Biology	5	5	Too low	Yes, at both levels	Yes, at both levels	Merged	20	Probability, Linear algebra	Yes	Lecturer and above	Male	North America
466	2/17/2012 14:06:36	Statistics	Biology	3	3	Just right	Yes, at both levels	No	Merged	30	Probability, Calculus , Geometry	No	Postdoc	Female	North America
467	2/17/2012 14:20:09	Statistics	Other	4	3	Too low	Yes, at both levels	Yes, at both levels	Merged	40	Probability, Linear algebra	No	Other	Male	North America
468	2/17/2012 14:26:34	Statistics, Theory	Biology	4	3	Too low	Yes, at both levels	Yes, at both levels	Merged	30	Graph theory, Geometry	No	PhD student	Female	North America
469	2/17/2012 14:29:25	Statistics, Theory	Biology	5	2	Just right	Yes, at both levels	Yes, at undergraduate level	Separated	20	Graph theory, Geometry	No	Other	Female	Asia
470	2/17/2012 14:30:13	Statistics, Theory	Biology	4	3	Just right	Yes, at undergraduate level	Yes, at both levels	Merged	50	Geometry	Yes	PhD student	Female	North America
471	2/17/2012 14:34:58	Statistics	Biology	3	3	Just right	Yes, at undergraduate level	Yes, at both levels	Merged	20	Linear algebra , Graph theory	No	PhD student	Male	North America
472	2/17/2012 14:39:56	Statistics	Biology	3	3	Just right	Yes, at both levels	Yes, at both levels	Merged	30	Calculus , Linear algebra	No	PhD student	Female	North America
473	2/17/2012 14:44:37	Statistics, Theory	Biology	4	1	Too low	Yes, at both levels	Yes, at both levels	Separated	50	Probability, Calculus	No	PhD student	Female	North America
474	2/17/2012 14:46:58	Statistics, Theory	Biology	3	1	Too low	Yes, at both levels	Yes, at both levels	Separated	20	Calculus , Graph theory	Yes	Lecturer and above	Male	North America
475	2/17/2012 14:48:58	Statistics	Biology	3	3	Just right	Yes, at graduate level	Yes, at both levels	Merged	20	Calculus , Linear algebra	No	PhD student	Female	North America
476	2/17/2012 14:54:37	Statistics	Biology	3	1	Too low	Yes, at graduate level	Yes, at both levels	Merged	30	Graph theory, Geometry	No	Other	Female	North America
477	2/17/2012 14:56:45	Decision making	Applied or pure mathematics	4	4	Too low	Yes, at both levels	Yes, at both levels	Merged	10	Probability, Linear algebra	Yes	PhD student	Female	North America
478	2/17/2012 15:00:07	Decision making	Applied or pure mathematics	5	5	Just right	Yes, at both levels	Yes, at both levels	Separated	50	Geometry	Yes	PhD student	Male	North America
479	2/17/2012 15:08:06	Statistics, Decision making	Other	2	3	Just right	No	No	Separated	20	Probability, Linear algebra , Graph theory, Geometry	Yes	Other	Male	North America
480	2/17/2012 15:16:10	Statistics	Biology	4	3	Just right	Yes, at undergraduate level	Yes, at both levels	Separated	10	Probability, Calculus , Linear algebra	No	Lecturer and above	Female	North America
481	2/17/2012 15:25:57	Statistics, Theory, Decision making	Physics	5	5	NA	Yes, at both levels	Yes, at both levels	Separated	20	Probability	No	PhD student	Female	North America
482	2/17/2012 15:26:05	Statistics	Biology	5	5	Too low	No	Yes, at both levels	Merged	30	Calculus , Graph theory	Yes	PhD student	Male	North America
483	2/17/2012 15:31:34	Statistics	Biology	5	3	Too low	Yes, at both levels	Yes, at both levels	Merged	30	Calculus , Linear algebra , Graph theory	No	Postdoc	Female	North America
484	2/17/2012 15:32:47	Statistics	Other	5	3	Too low	Yes, at undergraduate level	No	Separated	20	Graph theory	No	Other	Female	Asia
485	2/17/2012 15:32:49	Statistics, Decision making	Biology	5	4	Just right	No	Yes, at graduate level	Merged	60	NA	Yes	Other	Female	North America
486	2/17/2012 15:33:03	Statistics	Biology	4	3	Too low	Yes, at both levels	Yes, at both levels	Merged	20	Graph theory	No	Lecturer and above	Male	North America
487	2/17/2012 15:37:19	Statistics	Biology	3	2	Just right	No	Yes, at both levels	Separated	30	NA	No	Postdoc	Female	North America
488	2/17/2012 15:39:12	Statistics	Biology	2	2	Too low	Yes, at both levels	Yes, at both levels	Merged	30	Probability, Graph theory	No	PhD student	Female	North America
489	2/17/2012 15:43:07	Statistics	Biology	3	4	Too low	Yes, at both levels	Yes, at both levels	Separated	40	Probability, Calculus , Linear algebra , Graph theory, Geometry	No	Postdoc	Male	North America
490	2/17/2012 15:43:37	Statistics, Theory	Biology	4	4	Too low	Yes, at both levels	Yes, at both levels	Separated	40	Probability, Calculus , Linear algebra	No	PhD student	Male	Asia
491	2/17/2012 15:57:02	Statistics	Biology	1	2	Too low	Yes, at both levels	Yes, at both levels	Merged	30	Probability, Calculus , Linear algebra	No	PhD student	Male	North America
492	2/17/2012 15:57:29	Statistics, Theory	Biology	4	3	Too low	Yes, at both levels	No	Merged	10	Graph theory	Yes	Lecturer and above	Male	North America
493	2/17/2012 16:09:40	Statistics, Theory	Other	4	2	Too low	Yes, at undergraduate level	Yes, at graduate level	Separated	20	Probability, Calculus , Linear algebra , Graph theory, Geometry	No	Lecturer and above	NA	North America
494	2/17/2012 16:09:41	Statistics, Theory	Other	4	2	Too low	Yes, at undergraduate level	Yes, at graduate level	Separated	20	Probability, Calculus , Linear algebra , Graph theory, Geometry	No	Lecturer and above	NA	North America
495	2/17/2012 16:13:10	Statistics	Other	4	3	Too low	Yes, at both levels	Yes, at both levels	Merged	0	Probability, Calculus , Linear algebra	No	Lecturer and above	Female	North America
496	2/17/2012 16:17:17	Statistics, Theory	Biology	5	5	Too low	Yes, at both levels	Yes, at both levels	Separated	30	NA	Yes	PhD student	Male	North America
497	2/17/2012 16:17:38	Statistics	Biology	2	4	Too low	Yes, at both levels	Yes, at both levels	Separated	10	Probability, Calculus	No	Postdoc	Female	North America
498	2/17/2012 16:23:41	Statistics, Theory, Decision making	Biology	4	3	NA	Yes, at both levels	Yes, at both levels	Merged	40	Linear algebra	No	PhD student	Female	North America
499	2/17/2012 16:23:45	Statistics, Theory	Biology	3	4	Too low	Yes, at both levels	Yes, at both levels	Merged	30	Probability, Calculus , Linear algebra	No	Lecturer and above	Female	North America
500	2/17/2012 16:30:13	Statistics, Theory	Biology	3	5	Too low	Yes, at both levels	Yes, at both levels	Merged	20	Linear algebra	No	PhD student	Male	North America
501	2/17/2012 16:45:04	Statistics	Biology	3	2	Just right	Yes, at both levels	Yes, at undergraduate level	Separated	30	Calculus , Linear algebra , Graph theory	No	PhD student	Male	North America
502	2/17/2012 16:53:57	Statistics, Theory	Other	3	4	Just right	Yes, at graduate level	Yes, at both levels	Merged	20	Calculus	No	PhD student	Male	North America
503	2/17/2012 16:55:37	Statistics	Biology	2	4	Too low	Yes, at both levels	Yes, at both levels	Separated	30	Probability, Calculus , Linear algebra , Graph theory	No	PhD student	Male	Europe
504	2/17/2012 17:07:30	Statistics, Decision making	Biology	4	4	Too low	Yes, at both levels	Yes, at both levels	Separated	40	Calculus , Linear algebra	No	Postdoc	Male	North America
505	2/17/2012 17:19:54	Statistics	Biology	2	2	Too low	Yes, at undergraduate level	Yes, at both levels	Merged	40	Probability, Calculus , Linear algebra	No	Postdoc	Female	North America
506	2/17/2012 17:32:33	Statistics, Theory	Biology	4	4	Too low	Yes, at undergraduate level	Yes, at undergraduate level	Merged	30	Probability, Calculus	No	Postdoc	Male	North America
507	2/17/2012 17:34:23	Statistics, Decision making	Biology	5	3	Too low	Yes, at both levels	Yes, at both levels	Merged	30	Probability, Linear algebra , Graph theory	No	Other	Male	North America
508	2/17/2012 17:34:30	Statistics	Biology	3	1	Too low	Yes, at both levels	Yes, at both levels	Merged	40	Calculus	No	Postdoc	Male	North America
509	2/17/2012 17:37:16	Statistics	Biology	3	3	Just right	No	Yes, at both levels	Separated	20	Probability, Calculus	Yes	Lecturer and above	Male	Europe
510	2/17/2012 17:37:44	Statistics	Biology	2	2	Too low	Yes, at graduate level	Yes, at both levels	Merged	30	Probability	No	Postdoc	Female	Europe
511	2/17/2012 17:38:13	Statistics, Theory	Biology	5	3	Too low	Yes, at both levels	Yes, at both levels	Separated	20	Calculus , Linear algebra	No	Lecturer and above	Male	Europe
512	2/17/2012 17:38:35	Statistics	Other	5	4	Just right	Yes, at undergraduate level	Yes, at undergraduate level	Separated	30	Graph theory	Yes	Postdoc	Female	Europe
513	2/17/2012 17:38:37	Statistics, Theory	Biology	5	4	Just right	NA	Yes, at both levels	Merged	30	Calculus , Graph theory	No	Lecturer and above	Female	Europe
514	2/17/2012 17:38:54	Statistics	Biology	2	2	Too low	Yes, at both levels	Yes, at both levels	Merged	70	Probability, Linear algebra , Graph theory	No	PhD student	Female	Europe
515	2/17/2012 17:39:35	Statistics, Theory	Biology	4	4	Too low	Yes, at graduate level	Yes, at graduate level	Merged	10	NA	No	Postdoc	NA	NA
516	2/17/2012 17:39:56	Statistics	Biology	3	2	Just right	No	Yes, at both levels	Separated	30	Linear algebra , Graph theory	No	Lecturer and above	Female	Europe
517	2/17/2012 17:41:12	Statistics	Biology	3	1	Too low	Yes, at both levels	Yes, at both levels	Merged	30	Probability, Graph theory	No	Lecturer and above	Male	Europe
518	2/17/2012 17:41:46	Statistics, Decision making	Biology	4	3	Too low	Yes, at both levels	Yes, at both levels	Merged	40	Probability, Linear algebra , Graph theory	No	PhD student	Female	North America
519	2/17/2012 17:42:50	Statistics	Biology	2	3	Just right	Yes, at both levels	Yes, at both levels	Merged	40	Probability, Calculus , Linear algebra , Graph theory, Geometry	No	Lecturer and above	Female	Europe
520	2/17/2012 17:42:52	Statistics	Biology	1	3	Too high	Yes, at graduate level	Yes, at undergraduate level	Merged	30	Probability, Graph theory	No	PhD student	Female	Europe
521	2/17/2012 17:43:59	Statistics	Biology	2	3	Just right	Yes, at both levels	Yes, at both levels	NA	20	NA	No	PhD student	Female	Europe
522	2/17/2012 17:44:40	Statistics, Theory	Biology	5	5	Too low	Yes, at both levels	Yes, at both levels	Merged	30	Probability, Calculus , Linear algebra , Graph theory, Geometry	Yes	Lecturer and above	Male	Europe
523	2/17/2012 17:45:36	Statistics, Theory, Decision making	Biology	5	5	Too low	Yes, at graduate level	Yes, at both levels	Merged	30	Probability, Calculus , Linear algebra , Graph theory, Geometry, Other	No	Postdoc	Male	Europe
524	2/17/2012 17:45:42	Statistics	Biology	4	3	Too low	Yes, at both levels	Yes, at both levels	Separated	40	Graph theory, Geometry	NA	PhD student	Female	Europe
525	2/17/2012 17:46:18	Statistics, Theory	Biology	5	4	Too low	Yes, at graduate level	Yes, at undergraduate level	NA	30	Graph theory, Geometry	Yes	Lecturer and above	Female	Europe
526	2/17/2012 17:47:03	Statistics	Biology	4	3	Too low	Yes, at both levels	Yes, at both levels	Merged	10	Calculus	No	Lecturer and above	Male	North America
527	2/17/2012 17:48:06	Statistics	Biology	3	3	Just right	No	Yes, at both levels	Merged	30	Probability	Yes	Other	Male	Europe
528	2/17/2012 17:48:25	Statistics, Theory	Biology	4	4	Too low	Yes, at both levels	Yes, at both levels	Merged	30	Graph theory, Geometry	No	Lecturer and above	Male	Europe
529	2/17/2012 17:56:48	Statistics, Theory	Biology	4	5	Too low	Yes, at both levels	Yes, at both levels	Merged	50	Probability, Calculus , Linear algebra	No	Postdoc	Male	Europe
530	2/17/2012 17:59:18	Statistics, Theory	Biology	2	3	Too low	Yes, at both levels	Yes, at both levels	Merged	30	Probability, Calculus , Linear algebra	No	Postdoc	Female	Europe
531	2/17/2012 18:04:27	Statistics, Theory	Biology	2	3	Too low	Yes, at both levels	Yes, at both levels	Separated	30	Probability, Calculus , Linear algebra , Graph theory, Geometry, Other	No	PhD student	Female	Europe
532	2/17/2012 18:32:01	Statistics, Theory, Decision making	Biology	4	4	Too low	Yes, at both levels	Yes, at both levels	Merged	20	Probability, Calculus , Linear algebra , Graph theory, Geometry	No	PhD student	Female	Europe
533	2/17/2012 18:38:39	Statistics	Other	3	2	Too low	No	Yes, at both levels	Merged	30	Other	No	PhD student	Female	North America
534	2/17/2012 18:43:46	Statistics, Theory	Biology	3	3	Too low	Yes, at both levels	No	Merged	30	Probability, Calculus	No	PhD student	Male	Europe
535	2/17/2012 18:47:45	Statistics, Decision making	Biology	4	3	Just right	Yes, at both levels	Yes, at undergraduate level	Separated	30	Probability, Calculus , Linear algebra , Graph theory	No	Postdoc	Male	Europe
536	2/17/2012 18:51:00	Statistics	Biology	3	1	Too low	Yes, at both levels	Yes, at both levels	Merged	20	Probability, Calculus , Linear algebra	No	Postdoc	Male	Europe
537	2/17/2012 18:51:52	Statistics, Theory, Decision making	Biology	4	3	Too low	Yes, at both levels	Yes, at graduate level	Separated	20	Probability, Graph theory	Yes	PhD student	Female	North America
538	2/17/2012 18:52:44	Statistics, Theory	Biology	4	2	Too low	Yes, at both levels	Yes, at both levels	Separated	40	Probability, Calculus , Linear algebra , Graph theory, Geometry	No	Lecturer and above	Male	Europe
539	2/17/2012 18:55:47	Statistics	Biology	4	3	Too low	Yes, at both levels	Yes, at both levels	Merged	30	Probability, Calculus , Linear algebra , Graph theory	Yes	Other	Male	Europe
540	2/17/2012 18:58:18	Statistics	Biology	4	3	Just right	Yes, at graduate level	Yes, at both levels	Separated	30	Probability, Calculus , Linear algebra , Graph theory	No	PhD student	Male	Europe
541	2/17/2012 19:03:05	Statistics, Theory	NA	3	3	Too low	Yes, at both levels	Yes, at both levels	Separated	20	Calculus , Linear algebra , Graph theory	No	Postdoc	Female	Asia
542	2/17/2012 19:13:11	Statistics	Biology	3	2	Too low	Yes, at undergraduate level	Yes, at both levels	Separated	30	Graph theory, Geometry	Yes	PhD student	Female	North America
543	2/17/2012 19:20:53	Statistics	Biology	1	2	Just right	Yes, at graduate level	Yes, at graduate level	Merged	20	Probability, Geometry	No	Other	Female	North America
544	2/17/2012 19:27:37	Statistics	Biology	2	2	Just right	No	No	Merged	0	NA	No	Postdoc	Male	Europe
545	2/17/2012 19:27:41	Statistics	Biology	2	1	Too low	Yes, at both levels	Yes, at both levels	Merged	30	Probability, Calculus , Linear algebra	No	Lecturer and above	Male	Europe
546	2/17/2012 19:30:57	Statistics, Theory, Decision making	Biology	5	4	Too low	Yes, at both levels	Yes, at both levels	Merged	50	Probability, Calculus , Linear algebra	No	Postdoc	Male	Europe
547	2/17/2012 19:45:12	Statistics	Biology	3	2	Too low	Yes, at both levels	Yes, at both levels	Merged	50	Probability, Graph theory	No	PhD student	Male	North America
548	2/17/2012 19:51:33	Statistics, Theory	Biology	3	5	Too low	Yes, at graduate level	Yes, at graduate level	Merged	30	Probability, Calculus , Linear algebra	No	Postdoc	Male	Europe
549	2/17/2012 19:58:31	Statistics	Biology	1	1	Too high	No	Yes, at both levels	Separated	10	Probability, Geometry	No	Other	Male	Asia
550	2/17/2012 20:04:52	Statistics	Biology	3	2	Too low	Yes, at both levels	Yes, at both levels	Merged	50	Probability	No	PhD student	Male	North America
551	2/17/2012 20:23:14	Statistics, Decision making	Biology	1	2	Too low	Yes, at both levels	Yes, at both levels	Separated	10	Probability, Calculus , Linear algebra , Graph theory, Geometry, Other	No	Postdoc	Female	Europe
552	2/17/2012 20:45:17	Statistics, Theory	Biology	4	3	Too low	Yes, at graduate level	No	Merged	20	Calculus , Linear algebra	No	Lecturer and above	Male	Europe
553	2/17/2012 20:47:53	Statistics, Decision making	Biology	1	4	Just right	Yes, at both levels	Yes, at both levels	Merged	10	Linear algebra , Graph theory	No	Other	Female	North America
554	2/17/2012 20:57:34	Statistics, Theory	Biology	5	5	Too low	Yes, at graduate level	Yes, at both levels	Merged	20	Probability, Calculus , Linear algebra , Other	No	Lecturer and above	Male	Europe
555	2/17/2012 21:18:18	Statistics	Biology	3	3	Just right	Yes, at graduate level	Yes, at both levels	Merged	30	Probability, Calculus , Linear algebra	Yes	Lecturer and above	Male	Australia and New Zealand
556	2/17/2012 21:19:09	NA	Biology	3	2	Just right	No	Yes, at both levels	Separated	20	Probability	Yes	Postdoc	Male	North America
557	2/17/2012 21:30:51	Statistics	Biology	5	2	Too low	Yes, at both levels	Yes, at both levels	Merged	50	Probability, Calculus , Linear algebra	No	Lecturer and above	Male	North America
558	2/17/2012 21:59:01	Theory, Decision making	Applied or pure mathematics	5	5	Too low	Yes, at both levels	Yes, at undergraduate level	Merged	30	Probability, Graph theory	Yes	PhD student	Female	North America
559	2/17/2012 22:08:17	Statistics, Decision making	Biology	4	4	Too low	Yes, at both levels	Yes, at both levels	Merged	30	Graph theory, Geometry	Yes	Lecturer and above	Male	Europe
560	2/17/2012 22:56:19	Statistics	Biology	1	2	Too low	Yes, at graduate level	Yes, at both levels	Merged	10	Probability, Calculus	No	Lecturer and above	Male	Europe
561	2/17/2012 22:57:14	Statistics, Theory, Decision making	Biology	5	2	Just right	Yes, at both levels	Yes, at both levels	Merged	20	Graph theory	Yes	PhD student	Female	North America
562	2/17/2012 23:03:40	Statistics, Theory	Biology	4	4	Just right	No	Yes, at both levels	Merged	40	Probability, Linear algebra	No	Other	Male	Europe
563	2/17/2012 23:21:11	Theory	Applied or pure mathematics	5	5	Too low	Yes, at both levels	Yes, at both levels	Separated	60	NA	Yes	Lecturer and above	Male	Europe
564	2/17/2012 23:43:47	Statistics, Theory, Decision making	Biology	4	4	Too low	Yes, at both levels	Yes, at both levels	Merged	40	Probability, Other	No	Postdoc	Male	North America
565	2/17/2012 23:45:32	Statistics	Biology	4	3	Too low	Yes, at both levels	Yes, at both levels	Merged	50	Graph theory, Geometry	No	PhD student	Male	North America
566	2/18/2012 0:09:49	Statistics	Biology	3	2	Too low	Yes, at both levels	Yes, at both levels	Merged	40	Calculus , Linear algebra , Graph theory, Geometry	No	PhD student	Male	South America
567	2/18/2012 0:16:39	Statistics	Other	2	2	Too low	Yes, at undergraduate level	Yes, at both levels	Merged	20	Calculus , Linear algebra	No	PhD student	Female	North America
568	2/18/2012 0:53:16	Statistics	Biology	4	4	Too low	Yes, at undergraduate level	Yes, at undergraduate level	Merged	20	Calculus , Graph theory	No	PhD student	Male	North America
569	2/18/2012 2:57:25	Statistics, Theory	Biology	4	3	Too low	Yes, at graduate level	Yes, at graduate level	Separated	30	Calculus , Linear algebra	No	PhD student	Male	North America
570	2/18/2012 4:11:10	Statistics	Biology	4	2	Too low	Yes, at both levels	Yes, at both levels	Separated	0	Probability	No	PhD student	Female	North America
571	2/18/2012 4:19:04	Statistics, Theory	Biology	5	3	Too low	Yes, at both levels	No	Merged	30	Calculus , Linear algebra	No	PhD student	Male	North America
572	2/18/2012 4:22:10	Statistics, Theory	Biology	4	3	Too low	Yes, at both levels	Yes, at both levels	Merged	20	Linear algebra	No	PhD student	Female	North America
573	2/18/2012 4:47:46	Statistics, Theory	Other	4	2	Just right	Yes, at graduate level	Yes, at graduate level	Merged	20	Probability	Yes	Lecturer and above	Male	Europe
574	2/18/2012 5:07:29	Statistics, Theory, Decision making	Biology	5	3	Too low	Yes, at both levels	Yes, at both levels	Merged	50	Calculus , Linear algebra , Graph theory	Yes	PhD student	Male	North America
575	2/18/2012 7:08:23	Statistics	Biology	5	1	Too low	Yes, at graduate level	Yes, at graduate level	Separated	30	Calculus , Linear algebra , Geometry, Other	No	Postdoc	Male	Asia
576	2/18/2012 7:12:08	Statistics	Biology	3	3	Too low	Yes, at both levels	Yes, at both levels	Merged	40	Probability, Linear algebra , Other	No	Other	Male	Europe
577	2/18/2012 7:18:35	Statistics, Theory	Biology	3	3	Just right	Yes, at both levels	Yes, at both levels	Separated	30	Graph theory	Yes	PhD student	Female	North America
578	2/18/2012 7:21:02	Statistics	Biology	3	2	Just right	No	Yes, at both levels	Merged	20	Probability, Linear algebra , Graph theory	No	Other	Male	North America
579	2/18/2012 7:43:33	Statistics, Decision making	Biology	3	3	Too low	Yes, at both levels	Yes, at both levels	Separated	20	Probability, Calculus , Linear algebra , Graph theory, Geometry	No	Lecturer and above	Male	Europe
580	2/18/2012 8:07:43	Statistics, Decision making	Biology	5	5	Too low	Yes, at undergraduate level	Yes, at both levels	Merged	20	Probability, Calculus , Linear algebra	No	Postdoc	Male	Europe
581	2/18/2012 8:43:11	Statistics, Theory	Biology	5	4	Too low	Yes, at both levels	Yes, at both levels	Merged	20	Calculus , Linear algebra , Geometry	No	Postdoc	Male	Europe
582	2/18/2012 9:35:56	Statistics	Biology	4	3	Too low	Yes, at undergraduate level	Yes, at both levels	Merged	30	Probability, Calculus , Linear algebra , Graph theory, Geometry, Other	No	Other	Male	North America
583	2/18/2012 9:52:49	Statistics, Theory	Biology	5	4	Too low	Yes, at both levels	Yes, at both levels	Merged	50	Linear algebra , Graph theory	No	PhD student	Male	North America
584	2/18/2012 10:01:11	Statistics	Biology	2	2	Just right	Yes, at graduate level	Yes, at both levels	Separated	20	Probability, Calculus	No	Postdoc	Female	Europe
585	2/18/2012 11:30:21	Statistics	Biology	3	1	Too low	Yes, at graduate level	Yes, at both levels	Separated	20	Probability, Calculus , Geometry	No	PhD student	Female	Europe
586	2/18/2012 11:49:18	Statistics	Other	4	4	Too low	Yes, at undergraduate level	Yes, at both levels	Separated	30	Probability, Graph theory, Geometry	No	Other	Male	Europe
587	2/18/2012 11:52:58	Statistics, Theory	Biology	5	5	Too low	Yes, at both levels	Yes, at both levels	Separated	30	Geometry	Yes	Lecturer and above	Male	Europe
588	2/18/2012 12:37:53	Statistics, Decision making	Biology	1	2	Too low	Yes, at both levels	Yes, at both levels	Merged	40	Probability	No	Other	Male	Asia
589	2/18/2012 12:40:47	Statistics, Theory, Decision making	Biology	5	5	Too low	Yes, at both levels	Yes, at both levels	Merged	30	Graph theory	Yes	Other	Male	Europe
590	2/18/2012 13:03:29	Statistics	Biology	2	2	Too low	Yes, at graduate level	Yes, at both levels	Merged	20	Calculus	No	PhD student	Male	Europe
591	2/18/2012 13:03:56	Statistics, Decision making	Biology	3	2	Too low	Yes, at both levels	Yes, at both levels	Merged	20	Probability, Calculus , Linear algebra	No	Lecturer and above	Female	Europe
592	2/18/2012 15:08:03	Theory	Applied or pure mathematics	5	5	Too low	Yes, at both levels	Yes, at both levels	Merged	20	Probability	Yes	PhD student	Male	North America
593	2/18/2012 15:59:01	Statistics	Biology	3	3	Too low	Yes, at both levels	No	Merged	20	Graph theory	No	Other	Female	North America
594	2/18/2012 16:08:55	Statistics, Theory	Biology	3	4	Too low	Yes, at both levels	Yes, at both levels	Merged	60	Graph theory	No	Postdoc	Male	Europe
595	2/18/2012 16:21:01	Statistics, Theory, Decision making	Other	4	4	Too low	Yes, at both levels	Yes, at both levels	Merged	20	Graph theory, Geometry	No	Lecturer and above	Male	Europe
596	2/18/2012 16:22:39	Statistics, Theory, Decision making	Biology	5	5	Too low	No	Yes, at both levels	Merged	30	Probability, Calculus , Linear algebra , Graph theory, Geometry, Other	Yes	Lecturer and above	Male	North America
597	2/18/2012 17:28:32	Statistics, Theory	Biology	3	2	Too low	Yes, at both levels	Yes, at graduate level	Merged	40	Probability, Calculus , Linear algebra , Graph theory	No	Other	Female	Europe
598	2/18/2012 18:11:51	Statistics, Theory	Biology	3	4	Too low	Yes, at both levels	Yes, at both levels	Separated	40	Calculus , Graph theory	No	PhD student	Male	North America
599	2/18/2012 18:43:45	Statistics	Biology	4	1	Just right	Yes, at both levels	Yes, at both levels	Separated	30	Probability	No	Other	Female	North America
600	2/18/2012 18:45:54	Statistics	Biology	2	4	Too low	Yes, at both levels	Yes, at both levels	Merged	20	Probability, Calculus , Linear algebra	No	Other	Male	Europe
601	2/18/2012 20:55:26	Statistics, Decision making	Biology	3	2	Too low	Yes, at both levels	Yes, at both levels	Merged	20	Linear algebra , Graph theory	No	PhD student	Male	North America
602	2/18/2012 21:09:33	Statistics	Physics	4	4	Just right	No	Yes, at both levels	Merged	50	Probability, Graph theory	Yes	Lecturer and above	Male	Europe
603	2/18/2012 21:11:33	Statistics	Biology	5	4	Too low	Yes, at undergraduate level	Yes, at both levels	Merged	20	Graph theory, Geometry	Yes	Lecturer and above	Male	Europe
604	2/18/2012 21:49:03	Statistics, Theory, Decision making	Biology	4	4	Too low	Yes, at both levels	Yes, at undergraduate level	Separated	30	Probability, Calculus , Linear algebra , Graph theory	No	PhD student	Male	Europe
605	2/18/2012 22:26:36	Statistics	Biology	4	2	Just right	Yes, at both levels	Yes, at both levels	Merged	70	Probability, Calculus	No	PhD student	Male	Asia
606	2/18/2012 23:28:37	Statistics, Theory	Biology	4	4	Too low	Yes, at both levels	Yes, at both levels	Merged	30	Probability, Calculus , Linear algebra	No	PhD student	Male	Europe
607	2/19/2012 0:07:51	NA	Biology	5	1	Too low	Yes, at undergraduate level	Yes, at undergraduate level	Merged	10	Probability, Calculus , Linear algebra , Other	Yes	Lecturer and above	Female	North America
608	2/19/2012 0:14:19	Statistics, Decision making	Biology	3	4	NA	No	Yes, at graduate level	Merged	30	Linear algebra , Graph theory	No	PhD student	Male	North America
609	2/19/2012 0:21:08	Statistics, Theory, Decision making	Biology	5	5	Just right	Yes, at both levels	Yes, at both levels	NA	30	Linear algebra	Yes	Lecturer and above	Male	North America
610	2/19/2012 1:27:37	Statistics, Theory, Decision making	Biology	5	5	Too low	Yes, at both levels	Yes, at both levels	Separated	40	Graph theory	No	PhD student	Male	South America
611	2/19/2012 1:28:45	Statistics, Theory	Biology	4	4	Too low	Yes, at both levels	Yes, at both levels	Merged	30	Linear algebra , Graph theory	Yes	Postdoc	Male	North America
612	2/19/2012 1:31:47	Statistics, Decision making	Biology	4	5	Too low	Yes, at both levels	Yes, at both levels	Merged	20	Probability, Other	Yes	Postdoc	Male	Australia and New Zealand
613	2/19/2012 1:44:08	Statistics	Applied or pure mathematics	5	5	Just right	Yes, at both levels	Yes, at both levels	Merged	40	Graph theory, Geometry	Yes	PhD student	Male	North America
614	2/19/2012 1:46:09	Statistics, Theory	Applied or pure mathematics	5	3	Too low	Yes, at both levels	Yes, at both levels	Merged	40	NA	Yes	Postdoc	Female	North America
615	2/19/2012 3:54:51	Statistics, Decision making	Biology	2	2	Too low	Yes, at undergraduate level	Yes, at both levels	Merged	20	Probability, Linear algebra , Graph theory	No	Postdoc	Female	Australia and New Zealand
616	2/19/2012 4:10:22	Statistics, Theory	Biology	4	3	Just right	No	Yes, at both levels	Merged	40	NA	Yes	PhD student	Male	North America
617	2/19/2012 5:20:48	Statistics, Decision making	Biology	5	3	Too low	Yes, at graduate level	Yes, at undergraduate level	Merged	30	Probability, Calculus , Linear algebra	No	Other	Male	North America
618	2/19/2012 8:27:25	Statistics	Biology	3	1	Too low	Yes, at graduate level	Yes, at both levels	Merged	30	Calculus , Linear algebra , Graph theory, Geometry, Other	No	Lecturer and above	Male	Asia
619	2/19/2012 11:31:50	Statistics	Biology	1	2	Too low	Yes, at both levels	Yes, at both levels	NA	10	Calculus , Linear algebra , Graph theory	No	Other	Male	North America
620	2/19/2012 11:36:47	Statistics, Theory	Biology	5	3	Too low	Yes, at both levels	Yes, at both levels	Merged	20	Calculus , Linear algebra , Graph theory	No	PhD student	Female	Europe
621	2/19/2012 11:39:39	Statistics, Decision making	Biology	2	2	Too low	Yes, at both levels	Yes, at both levels	Separated	30	Probability, Calculus , Linear algebra , Graph theory, Geometry, Other	No	PhD student	Male	Asia
622	2/19/2012 15:04:18	Statistics	Biology	2	2	Too low	Yes, at both levels	Yes, at both levels	Separated	60	Probability, Calculus , Linear algebra , Graph theory	No	Other	Female	Asia
623	2/19/2012 15:17:15	Statistics	Biology	4	3	Too low	Yes, at both levels	Yes, at both levels	Merged	20	Calculus , Linear algebra	Yes	Postdoc	Male	North America
624	2/19/2012 16:04:56	NA	Other	2	2	Just right	Yes, at both levels	NA	Merged	50	Probability, Calculus , Linear algebra , Graph theory	No	Other	Male	Asia
625	2/19/2012 16:46:00	Statistics, Theory	Biology	3	2	Too low	Yes, at both levels	Yes, at graduate level	Merged	20	Probability, Calculus , Linear algebra	No	PhD student	Male	North America
626	2/19/2012 17:03:55	Statistics	Biology	2	1	Just right	No	Yes, at both levels	Separated	70	Probability, Linear algebra	No	PhD student	Female	Europe
627	2/19/2012 18:42:10	Statistics, Theory	Other	4	3	Too low	Yes, at undergraduate level	Yes, at both levels	Merged	30	Probability, Graph theory	No	PhD student	Male	North America
628	2/19/2012 19:04:04	Statistics	Biology	3	4	Too low	Yes, at undergraduate level	Yes, at both levels	Merged	30	Probability, Graph theory	No	Other	Male	Europe
629	2/19/2012 19:05:36	Statistics, Theory	Biology	4	5	Too low	Yes, at undergraduate level	Yes, at both levels	Merged	50	Probability, Calculus , Linear algebra	Yes	Lecturer and above	Male	Europe
630	2/19/2012 19:22:37	Statistics, Theory	Biology	5	3	Too low	Yes, at both levels	Yes, at both levels	Separated	30	Calculus	No	PhD student	Male	North America
631	2/19/2012 20:42:57	Statistics, Theory	Biology	1	2	Just right	Yes, at both levels	Yes, at both levels	Merged	40	Probability, Calculus , Linear algebra , Geometry	No	Other	Female	South America
632	2/19/2012 21:24:19	Statistics, Theory	Applied or pure mathematics	5	5	Too low	Yes, at both levels	Yes, at both levels	Separated	40	Other	No	Lecturer and above	Male	Europe
633	2/19/2012 22:02:09	Statistics, Theory	Other	5	4	Too low	Yes, at undergraduate level	Yes, at both levels	Merged	20	Probability, Calculus , Linear algebra , Geometry, Other	No	Lecturer and above	Male	North America
634	2/19/2012 23:14:32	Statistics, Theory, Decision making	Biology	5	4	Too low	Yes, at both levels	Yes, at both levels	Separated	20	Probability, Calculus , Geometry	Yes	PhD student	Male	North America
635	2/19/2012 23:37:41	Statistics, Decision making	Biology	4	3	Too low	Yes, at both levels	Yes, at both levels	Merged	30	Probability, Calculus , Linear algebra	No	PhD student	Female	North America
636	2/20/2012 2:10:12	Statistics, Theory	Biology	3	3	Too low	Yes, at both levels	Yes, at both levels	Merged	20	Linear algebra , Graph theory, Other	No	PhD student	Male	Asia
637	2/20/2012 4:22:51	Statistics, Theory, Decision making	Biology	4	3	Too low	Yes, at both levels	Yes, at both levels	Merged	40	Probability, Calculus , Linear algebra , Graph theory	No	PhD student	Male	South America
638	2/20/2012 4:48:34	Statistics	Biology	3	2	Too low	No	Yes, at both levels	Separated	20	Linear algebra	No	PhD student	Female	North America
639	2/20/2012 5:06:01	NA	Other	1	1	Just right	Yes, at both levels	Yes, at both levels	Merged	30	Probability, Linear algebra , Other	No	Other	Female	Asia
640	2/20/2012 6:06:04	Statistics	Biology	3	2	Too high	No	Yes, at graduate level	Separated	10	Probability	No	PhD student	Male	North America
641	2/20/2012 8:38:47	Statistics	Biology	4	NA	Too low	Yes, at graduate level	Yes, at both levels	Separated	50	Probability, Calculus	No	PhD student	Female	Europe
642	2/20/2012 9:04:35	Statistics	Other	4	4	Too low	Yes, at both levels	Yes, at both levels	Merged	30	NA	Yes	PhD student	Male	Europe
643	2/20/2012 9:08:06	Statistics, Decision making	Biology	5	4	Just right	Yes, at graduate level	Yes, at both levels	Merged	30	Linear algebra , Geometry	No	Lecturer and above	Male	Europe
644	2/20/2012 9:26:42	Statistics	Biology	2	3	Just right	Yes, at both levels	Yes, at both levels	Separated	10	Graph theory	No	Lecturer and above	Female	Europe
645	2/20/2012 9:28:36	Statistics	Biology	2	2	Too low	Yes, at graduate level	Yes, at graduate level	Separated	20	Probability	No	PhD student	Female	Europe
646	2/20/2012 9:39:55	Statistics	Biology	3	4	Too low	Yes, at both levels	Yes, at both levels	Merged	20	Probability, Other	No	Postdoc	Female	Europe
647	2/20/2012 9:46:48	Statistics, Decision making	Biology	4	3	Too low	Yes, at both levels	Yes, at graduate level	Merged	10	Other	No	Postdoc	Male	Europe
648	2/20/2012 10:00:05	Statistics	Biology	2	1	Just right	No	Yes, at both levels	Separated	20	Probability	No	PhD student	Male	Europe
649	2/20/2012 10:01:24	Statistics, Theory	Applied or pure mathematics	5	5	Too low	Yes, at both levels	Yes, at both levels	Merged	40	Probability	Yes	PhD student	Male	Europe
650	2/20/2012 10:17:59	Statistics	Biology	4	1	Just right	No	Yes, at undergraduate level	Merged	10	Probability, Calculus , Linear algebra , Graph theory, Geometry	No	Lecturer and above	Male	Europe
651	2/20/2012 10:19:49	Statistics	Biology	2	1	Just right	No	Yes, at both levels	Merged	20	NA	No	Lecturer and above	Female	Europe
652	2/20/2012 10:28:18	Statistics, Theory	Biology	5	5	Too low	Yes, at both levels	Yes, at both levels	Merged	50	Calculus , Graph theory	No	Lecturer and above	Male	Europe
653	2/20/2012 10:40:21	Statistics, Decision making	Biology	3	5	Too low	Yes, at graduate level	Yes, at graduate level	Merged	10	Graph theory	No	Lecturer and above	Male	Europe
654	2/20/2012 10:43:26	Statistics	Biology	5	5	Just right	Yes, at graduate level	Yes, at graduate level	Merged	40	Calculus , Linear algebra	Yes	Other	Male	Asia
655	2/20/2012 10:56:11	Statistics	Biology	5	5	Too low	Yes, at both levels	Yes, at both levels	Merged	20	Probability, Calculus , Linear algebra	No	Lecturer and above	Female	Europe
656	2/20/2012 11:45:52	Statistics	Biology	3	3	Too low	Yes, at both levels	Yes, at both levels	Merged	10	Probability, Calculus , Linear algebra , Graph theory	No	PhD student	Male	Europe
657	2/20/2012 12:28:47	Statistics	Biology	2	1	Too low	Yes, at undergraduate level	Yes, at graduate level	Separated	20	Probability, Calculus , Linear algebra	No	Postdoc	Female	Europe
658	2/20/2012 13:08:47	Statistics, Theory	Biology	5	5	Just right	Yes, at both levels	Yes, at both levels	Separated	20	Graph theory	Yes	Postdoc	Female	Europe
659	2/20/2012 14:25:37	Statistics, Theory	Applied or pure mathematics	3	4	Too low	Yes, at graduate level	Yes, at graduate level	Separated	30	Probability, Calculus	Yes	Postdoc	Male	Europe
660	2/20/2012 14:30:15	Statistics, Theory	Biology	5	5	Too low	Yes, at both levels	Yes, at both levels	Merged	20	Probability, Calculus , Linear algebra , Other	Yes	Lecturer and above	NA	Europe
661	2/20/2012 14:30:53	Statistics	Biology	4	3	Too low	Yes, at both levels	No	Separated	20	Calculus , Linear algebra	No	Postdoc	Male	Europe
662	2/20/2012 14:38:12	Theory	Applied or pure mathematics	5	4	Too low	Yes, at undergraduate level	Yes, at undergraduate level	Merged	20	Probability	Yes	Lecturer and above	Male	Europe
663	2/20/2012 14:47:05	Statistics, Theory, Decision making	Biology	4	3	Too low	Yes, at both levels	Yes, at both levels	Merged	30	Probability, Calculus , Linear algebra , Graph theory, Geometry	Yes	Lecturer and above	Male	North America
664	2/20/2012 14:59:04	Statistics, Decision making	Biology	2	2	Too low	Yes, at both levels	Yes, at both levels	Separated	30	Probability, Calculus , Graph theory	No	PhD student	Male	Europe
665	2/20/2012 14:59:52	Statistics	Biology	4	3	Too low	Yes, at both levels	Yes, at both levels	Separated	20	Graph theory, Geometry	No	PhD student	Male	Europe
666	2/20/2012 15:01:14	Statistics	Biology	3	3	Too low	Yes, at both levels	Yes, at both levels	Merged	40	Probability	Yes	PhD student	Female	North America
667	2/20/2012 15:01:54	Theory	Biology	3	2	Too low	Yes, at both levels	Yes, at both levels	Separated	10	Probability, Calculus , Linear algebra , Graph theory, Geometry	No	Lecturer and above	Male	Europe
668	2/20/2012 15:02:57	Statistics, Theory	Biology	4	3	Too low	Yes, at both levels	No	Merged	30	Probability, Calculus , Linear algebra	No	Postdoc	Male	Europe
669	2/20/2012 15:04:20	Statistics	Biology	4	3	Too low	Yes, at both levels	Yes, at both levels	Merged	30	Calculus , Linear algebra	No	Lecturer and above	Male	Europe
670	2/20/2012 15:05:37	Statistics, Theory	Biology	3	3	Too low	Yes, at both levels	No	Separated	20	Probability, Calculus , Linear algebra	No	Postdoc	Male	Europe
671	2/20/2012 15:07:29	Statistics	Biology	2	2	Too low	Yes, at both levels	Yes, at both levels	Merged	50	Probability, Calculus , Linear algebra , Graph theory, Geometry	No	PhD student	Female	Europe
672	2/20/2012 15:07:55	Statistics, Theory	Biology	5	5	Too low	Yes, at both levels	Yes, at both levels	Merged	20	Graph theory, Geometry, Other	Yes	PhD student	Male	Europe
673	2/20/2012 15:10:02	Statistics, Decision making	Biology	3	2	Too low	Yes, at both levels	Yes, at both levels	Merged	20	Calculus , Linear algebra , Graph theory	No	Lecturer and above	Female	Europe
674	2/20/2012 15:11:01	Statistics	Biology	4	2	Too low	Yes, at both levels	Yes, at both levels	Merged	30	Probability, Calculus , Linear algebra , Graph theory	No	PhD student	Male	Africa
675	2/20/2012 15:11:22	Statistics	Biology	3	2	Too low	Yes, at both levels	Yes, at both levels	Separated	30	Linear algebra , Graph theory	No	Lecturer and above	Male	Europe
676	2/20/2012 15:25:31	Statistics	Biology	3	1	Just right	Yes, at both levels	Yes, at both levels	Separated	20	Other	Yes	Postdoc	Female	Europe
677	2/20/2012 15:25:33	Statistics	Biology	3	3	Too low	Yes, at both levels	Yes, at both levels	Separated	20	Calculus , Linear algebra	No	Postdoc	Female	Europe
678	2/20/2012 15:29:48	Statistics	Biology	4	2	Too high	Yes, at both levels	Yes, at both levels	Separated	10	Probability, Calculus , Linear algebra	Yes	Postdoc	Female	Europe
679	2/20/2012 15:32:39	Statistics	Other	2	2	Too low	No	Yes, at both levels	Merged	30	Probability, Calculus , Linear algebra	Yes	Postdoc	Female	North America
680	2/20/2012 15:35:16	Statistics	Biology	2	2	Just right	Yes, at graduate level	Yes, at both levels	Merged	20	Probability, Linear algebra , Graph theory, Geometry	No	Other	Female	Europe
681	2/20/2012 15:37:00	Statistics, Theory	Biology	3	2	Too low	Yes, at graduate level	Yes, at both levels	Merged	20	Probability, Calculus , Linear algebra	No	Postdoc	Male	Europe
682	2/20/2012 15:39:11	Statistics, Theory	Biology	4	4	Too low	Yes, at both levels	Yes, at both levels	Separated	50	Probability, Calculus , Linear algebra , Graph theory, Geometry	No	PhD student	Male	Europe
683	2/20/2012 15:46:28	Theory	Biology	4	3	Too low	Yes, at both levels	Yes, at both levels	Merged	70	Other	No	PhD student	Male	South America
684	2/20/2012 15:46:39	Statistics	NA	3	3	Too low	Yes, at graduate level	Yes, at undergraduate level	Separated	10	Calculus , Linear algebra , Graph theory	No	Lecturer and above	Male	Europe
685	2/20/2012 16:13:50	Statistics	Other	1	1	Too low	Yes, at both levels	Yes, at both levels	Merged	30	Probability, Calculus , Linear algebra , Graph theory, Geometry	No	PhD student	Female	Europe
686	2/20/2012 16:14:43	Decision making	Biology	4	2	Too low	Yes, at both levels	Yes, at both levels	Separated	20	Probability, Calculus , Linear algebra	No	Other	Male	Europe
687	2/20/2012 16:15:13	Statistics	Biology	4	3	Too low	Yes, at both levels	Yes, at both levels	Merged	30	Probability, Graph theory	No	PhD student	Male	Europe
688	2/20/2012 16:15:15	Statistics, Decision making	Biology	3	3	Too low	Yes, at both levels	Yes, at both levels	Merged	20	Probability, Graph theory	No	Lecturer and above	Male	Europe
689	2/20/2012 16:22:34	Statistics	Biology	3	3	Too low	Yes, at undergraduate level	No	Merged	10	Linear algebra , Graph theory	No	Postdoc	Male	Europe
690	2/20/2012 16:26:46	Statistics, Theory	Biology	3	3	Too low	Yes, at both levels	Yes, at both levels	Merged	20	Probability, Calculus	No	PhD student	Female	Europe
691	2/20/2012 16:27:21	Statistics, Theory	Biology	3	1	Just right	Yes, at graduate level	Yes, at graduate level	Merged	30	Probability, Calculus , Linear algebra	No	PhD student	Male	Europe
692	2/20/2012 16:28:50	Statistics	Biology	2	1	Just right	Yes, at both levels	Yes, at both levels	Separated	30	Probability, Calculus , Linear algebra , Graph theory, Geometry	No	PhD student	Female	Europe
693	2/20/2012 16:29:33	Statistics	Biology	3	1	Too low	Yes, at both levels	Yes, at both levels	Separated	10	Probability, Linear algebra , Graph theory	No	Lecturer and above	Female	Europe
694	2/20/2012 16:31:55	NA	Biology	1	2	Too low	Yes, at both levels	Yes, at both levels	Merged	20	Probability, Calculus , Linear algebra , Graph theory	No	PhD student	Female	Europe
695	2/20/2012 16:39:01	Statistics	Biology	1	1	Too low	Yes, at both levels	Yes, at both levels	Separated	20	Probability, Calculus , Linear algebra , Graph theory, Geometry, Other	No	PhD student	Female	Europe
696	2/20/2012 16:40:05	Statistics, Decision making	Biology	4	3	Too low	Yes, at both levels	Yes, at graduate level	Separated	10	Calculus , Linear algebra , Graph theory	No	Postdoc	Female	Europe
697	2/20/2012 16:40:58	Statistics, Theory	Physics	5	5	Too low	Yes, at both levels	Yes, at undergraduate level	Separated	50	Probability, Calculus , Graph theory	No	Postdoc	Male	Europe
698	2/20/2012 16:47:43	Statistics	Biology	3	2	Just right	Yes, at graduate level	No	Merged	20	Linear algebra , Other	No	Postdoc	Male	Europe
699	2/20/2012 16:58:25	Statistics	Other	3	3	Too high	No	Yes, at graduate level	Separated	20	Probability	Yes	PhD student	Female	Europe
700	2/20/2012 17:03:59	Statistics, Decision making	Biology	2	2	Too low	Yes, at both levels	Yes, at both levels	Separated	50	Probability, Calculus , Linear algebra , Graph theory, Geometry	No	PhD student	Female	Europe
701	2/20/2012 17:09:01	Statistics	Biology	5	2	Too low	Yes, at graduate level	Yes, at both levels	Merged	10	Calculus , Graph theory	Yes	Lecturer and above	Male	Europe
702	2/20/2012 17:13:43	Statistics	Biology	2	3	Too low	Yes, at undergraduate level	Yes, at both levels	Merged	30	Calculus , Linear algebra , Graph theory, Geometry	No	Postdoc	Male	North America
703	2/20/2012 17:40:55	Statistics, Theory	Biology	4	4	Just right	No	Yes, at both levels	Merged	30	Calculus , Other	Yes	PhD student	Male	Europe
704	2/20/2012 17:44:30	Statistics	Biology	4	2	Too low	Yes, at both levels	Yes, at both levels	Merged	30	Calculus , Linear algebra , Graph theory	No	PhD student	Female	Europe
705	2/20/2012 17:47:27	Statistics, Theory	Biology	4	5	Too low	Yes, at both levels	Yes, at both levels	Separated	30	Calculus , Graph theory	Yes	PhD student	Male	Europe
706	2/20/2012 18:16:29	Statistics	Biology	5	4	Too low	Yes, at both levels	Yes, at both levels	Merged	40	Probability, Calculus	Yes	Postdoc	Female	Europe
707	2/20/2012 18:20:41	Statistics	Other	3	3	Too low	Yes, at both levels	Yes, at both levels	Separated	20	Probability	No	Lecturer and above	Male	Europe
708	2/20/2012 18:37:40	Statistics, Theory, Decision making	Physics	5	5	Too low	Yes, at both levels	No	Merged	20	Probability, Calculus , Linear algebra	Yes	Lecturer and above	Male	Europe
709	2/20/2012 18:51:51	Statistics	Biology	2	2	Too high	Yes, at both levels	Yes, at both levels	Separated	10	Probability, Calculus , Linear algebra	No	Lecturer and above	Male	Europe
710	2/20/2012 19:16:50	Statistics	Biology	2	1	Too low	Yes, at both levels	Yes, at both levels	Separated	50	Calculus , Linear algebra , Geometry	No	PhD student	Male	South America
711	2/20/2012 19:27:29	Statistics, Theory, Decision making	Biology	3	2	Too low	Yes, at both levels	Yes, at both levels	Merged	30	Probability, Calculus , Linear algebra , Graph theory, Geometry, Other	No	Other	Female	Europe
712	2/20/2012 20:36:32	Statistics	Biology	4	2	Too low	Yes, at both levels	Yes, at both levels	Merged	40	Probability, Calculus , Linear algebra , Graph theory, Geometry	No	Postdoc	Male	North America
713	2/20/2012 20:38:06	Statistics, Theory	Other	4	4	Too low	Yes, at both levels	NA	NA	0	Graph theory	No	PhD student	Female	North America
714	2/20/2012 22:12:37	Statistics	Biology	5	3	Too low	Yes, at both levels	Yes, at both levels	Merged	30	Probability, Linear algebra , Graph theory	No	PhD student	Male	Europe
715	2/21/2012 0:05:58	Statistics	Biology	3	2	Too low	Yes, at both levels	Yes, at both levels	Separated	20	Probability, Calculus , Linear algebra	No	PhD student	Male	North America
716	2/21/2012 0:46:37	Statistics	Biology	2	3	Just right	Yes, at both levels	No	Merged	20	Probability, Calculus , Linear algebra , Graph theory, Geometry	No	Postdoc	Male	North America
717	2/21/2012 2:51:35	Statistics, Theory	Biology	5	5	Too low	Yes, at both levels	Yes, at both levels	Merged	30	Linear algebra	Yes	Lecturer and above	Male	North America
718	2/21/2012 4:56:49	Statistics	Biology	4	4	Too low	Yes, at both levels	Yes, at both levels	Merged	40	Probability, Calculus , Linear algebra , Graph theory, Geometry, Other	No	PhD student	Male	North America
719	2/21/2012 5:18:20	Statistics	Biology	1	1	Too low	Yes, at both levels	Yes, at both levels	Merged	90	Probability, Geometry	No	Postdoc	Female	Asia
720	2/21/2012 6:04:13	Statistics	Biology	2	1	Too low	Yes, at both levels	Yes, at both levels	Merged	20	Probability, Calculus , Linear algebra , Geometry	No	PhD student	Female	Europe
721	2/21/2012 7:04:02	Theory, Decision making	Applied or pure mathematics	5	5	Too low	Yes, at both levels	Yes, at undergraduate level	Separated	20	NA	Yes	Lecturer and above	Female	North America
722	2/21/2012 8:14:19	Statistics, Theory	Biology	5	4	Too low	Yes, at both levels	Yes, at both levels	Merged	10	Probability, Graph theory	Yes	PhD student	Male	Europe
723	2/21/2012 8:19:27	Statistics	Biology	4	4	Too low	Yes, at graduate level	Yes, at both levels	Separated	30	Probability, Linear algebra , Graph theory, Geometry	No	Lecturer and above	Male	Europe
724	2/21/2012 9:08:23	Statistics, Theory	Other	5	5	Too low	Yes, at both levels	Yes, at graduate level	Separated	20	NA	Yes	PhD student	Male	Europe
725	2/21/2012 9:27:40	Statistics	Biology	1	2	Too low	Yes, at graduate level	Yes, at both levels	Separated	20	Probability, Calculus , Graph theory, Other	No	PhD student	Female	Europe
726	2/21/2012 9:54:47	Statistics, Theory	Biology	4	4	Too low	Yes, at graduate level	Yes, at both levels	Separated	30	Calculus , Graph theory	Yes	Lecturer and above	Female	Europe
727	2/21/2012 10:16:58	Statistics, Theory, Decision making	Biology	5	5	Just right	Yes, at both levels	Yes, at both levels	Separated	20	Calculus , Linear algebra	No	Postdoc	Male	Europe
728	2/21/2012 10:29:03	Statistics	Other	4	3	Too low	Yes, at both levels	NA	NA	30	Graph theory, Other	No	PhD student	Female	Europe
729	2/21/2012 10:33:39	Statistics	Biology	3	2	Too low	Yes, at graduate level	Yes, at graduate level	Separated	20	Calculus , Linear algebra	No	Lecturer and above	Male	Europe
730	2/21/2012 10:55:07	Statistics	Biology	3	3	Just right	Yes, at graduate level	Yes, at undergraduate level	Merged	30	Linear algebra	Yes	PhD student	Male	Europe
731	2/21/2012 11:08:12	Statistics, Theory	Biology	2	2	Too low	Yes, at both levels	Yes, at both levels	Merged	50	Probability, Calculus , Linear algebra	No	Other	Male	Europe
732	2/21/2012 11:10:12	Statistics	Biology	4	3	Too low	Yes, at both levels	Yes, at both levels	Merged	30	Probability, Geometry	No	Postdoc	Female	Europe
733	2/21/2012 11:17:24	Statistics, Theory	Biology	4	4	Too low	Yes, at undergraduate level	Yes, at graduate level	Merged	20	Probability, Calculus	No	Lecturer and above	Male	Europe
734	2/21/2012 11:28:44	Statistics	Biology	2	3	Too low	Yes, at both levels	Yes, at both levels	Separated	30	Probability, Calculus , Linear algebra	No	PhD student	Female	North America
735	2/21/2012 11:31:30	Statistics, Theory	Biology	4	5	Too low	Yes, at both levels	Yes, at both levels	Merged	40	Probability, Calculus , Linear algebra , Graph theory, Geometry	Yes	Lecturer and above	Male	Europe
736	2/21/2012 11:31:53	Statistics	Biology	2	4	Too low	Yes, at graduate level	Yes, at both levels	Merged	20	Probability, Calculus , Linear algebra	No	PhD student	Male	Europe
737	2/21/2012 11:32:29	Statistics, Theory	Biology	1	4	Too low	Yes, at both levels	Yes, at both levels	Separated	40	Probability, Linear algebra , Geometry	No	PhD student	Female	Europe
738	2/21/2012 11:32:55	Statistics	Biology	NA	3	Too low	Yes, at graduate level	Yes, at both levels	Separated	20	Probability, Linear algebra , Graph theory	No	Postdoc	Female	Europe
739	2/21/2012 11:40:37	Statistics	Other	3	2	Just right	Yes, at graduate level	Yes, at both levels	Separated	20	Probability, Linear algebra , Graph theory, Geometry	Yes	Postdoc	Female	Europe
740	2/21/2012 12:01:57	Statistics, Theory, Decision making	Applied or pure mathematics	5	5	Too low	Yes, at both levels	Yes, at both levels	Merged	20	NA	Yes	Lecturer and above	Male	Australia and New Zealand
741	2/21/2012 12:08:06	Statistics, Theory	Biology	1	3	Too low	Yes, at both levels	Yes, at both levels	Separated	20	Probability, Graph theory, Other	No	Other	Female	Europe
742	2/21/2012 12:09:46	Statistics, Theory	Biology	4	5	Too low	Yes, at both levels	Yes, at both levels	Merged	40	Probability, Calculus , Linear algebra , Graph theory, Geometry	No	PhD student	Female	Europe
743	2/21/2012 12:14:01	NA	Biology	1	1	Too low	Yes, at undergraduate level	Yes, at undergraduate level	Merged	20	Probability, Calculus , Linear algebra , Graph theory, Geometry	No	PhD student	Male	Europe
744	2/21/2012 12:33:33	Statistics, Theory	Other	4	3	Too low	Yes, at both levels	Yes, at graduate level	Merged	10	Probability	No	PhD student	Male	North America
745	2/21/2012 13:07:54	Statistics, Theory	Biology	3	4	Just right	Yes, at both levels	Yes, at both levels	Separated	30	Linear algebra	Yes	PhD student	Female	North America
746	2/21/2012 13:24:27	Statistics	Biology	2	2	Too low	Yes, at both levels	Yes, at both levels	Merged	30	Calculus , Linear algebra , Graph theory, Geometry	No	PhD student	Male	Europe
747	2/21/2012 14:13:05	Statistics	Biology	4	4	Too low	Yes, at both levels	Yes, at both levels	Merged	20	Calculus , Linear algebra , Graph theory	Yes	Postdoc	Male	Europe
748	2/21/2012 14:19:42	Statistics	Biology	4	4	Too low	Yes, at undergraduate level	No	Merged	10	Probability, Calculus , Linear algebra , Graph theory	Yes	Lecturer and above	Male	Europe
749	2/21/2012 14:39:33	Statistics	Biology	5	4	Too low	No	Yes, at both levels	Separated	20	Graph theory	Yes	PhD student	Male	Europe
750	2/21/2012 14:42:20	Statistics	Applied or pure mathematics	5	5	Too low	No	Yes, at both levels	Merged	10	Graph theory	Yes	Postdoc	Female	Europe
751	2/21/2012 14:43:17	Statistics	Biology	5	4	Too low	Yes, at both levels	Yes, at both levels	Merged	40	Probability, Calculus , Linear algebra , Graph theory, Geometry, Other	No	PhD student	Female	Europe
752	2/21/2012 14:45:11	Statistics	Applied or pure mathematics	NA	5	Too low	Yes, at both levels	Yes, at both levels	Separated	20	NA	No	Other	Male	Europe
753	2/21/2012 14:49:46	Theory	Applied or pure mathematics	5	3	Too low	Yes, at both levels	Yes, at both levels	Merged	60	Probability, Other	No	PhD student	Male	Africa
754	2/21/2012 14:51:38	Statistics, Decision making	Applied or pure mathematics	5	4	Too low	Yes, at undergraduate level	Yes, at both levels	Merged	20	NA	Yes	Other	Male	Europe
755	2/21/2012 14:57:26	Statistics	Biology	3	1	Too low	Yes, at undergraduate level	Yes, at both levels	Merged	10	NA	No	PhD student	Female	Europe
756	2/21/2012 14:59:04	Statistics	Biology	3	3	Too low	Yes, at both levels	Yes, at both levels	Merged	20	Probability, Calculus , Linear algebra , Geometry	No	Lecturer and above	Female	Europe
757	2/21/2012 14:59:29	Statistics, Theory, Decision making	Biology	2	2	Too low	Yes, at both levels	Yes, at both levels	Merged	30	Probability, Calculus , Linear algebra , Graph theory, Geometry	No	Postdoc	Male	Europe
758	2/21/2012 15:01:31	Statistics, Theory, Decision making	Applied or pure mathematics	5	5	Too low	Yes, at both levels	Yes, at both levels	Separated	30	NA	Yes	Lecturer and above	Male	Europe
759	2/21/2012 15:04:23	Statistics	Biology	3	3	Too high	No	Yes, at both levels	Merged	30	Probability, Graph theory, Geometry	No	PhD student	Male	Europe
760	2/21/2012 15:07:55	Statistics	Biology	3	3	Too low	Yes, at both levels	Yes, at both levels	Merged	40	Calculus , Graph theory	No	Other	Male	Europe
761	2/21/2012 15:08:33	Statistics, Theory, Decision making	Other	1	2	Too low	Yes, at both levels	Yes, at both levels	Separated	30	Probability, Graph theory	No	Other	Male	Europe
762	2/21/2012 15:12:05	NA	Biology	1	1	Too low	Yes, at both levels	Yes, at both levels	Separated	40	Probability, Graph theory, Geometry	No	Other	Female	Europe
763	2/21/2012 15:16:58	Statistics	Applied or pure mathematics	5	5	Just right	Yes, at both levels	Yes, at both levels	Separated	50	Other	Yes	Postdoc	Female	Europe
764	2/21/2012 15:23:36	Statistics, Decision making	Other	1	3	Too low	Yes, at both levels	Yes, at both levels	Separated	30	Probability, Calculus , Linear algebra , Graph theory, Geometry	No	Other	Male	Europe
765	2/21/2012 15:24:12	Statistics, Theory, Decision making	Biology	4	3	Too low	Yes, at both levels	Yes, at both levels	Merged	60	Probability, Calculus , Linear algebra	Yes	Lecturer and above	Male	Europe
766	2/21/2012 15:27:20	Statistics, Theory	Biology	5	3	Too low	Yes, at undergraduate level	No	Separated	30	Calculus	No	Other	Male	Europe
767	2/21/2012 15:30:20	Statistics	Biology	1	2	Too low	Yes, at both levels	Yes, at both levels	Separated	20	Probability, Calculus , Linear algebra	No	Postdoc	Female	Europe
768	2/21/2012 15:54:27	Statistics	Biology	5	5	Too low	Yes, at both levels	Yes, at both levels	Separated	20	Probability	Yes	PhD student	Female	Europe
769	2/21/2012 15:58:24	Statistics, Theory, Decision making	Other	5	5	Too low	Yes, at both levels	Yes, at both levels	Separated	40	NA	Yes	PhD student	Female	Europe
770	2/21/2012 16:11:38	Statistics, Theory, Decision making	Biology	3	3	Too low	Yes, at both levels	Yes, at both levels	Separated	20	Linear algebra	No	Lecturer and above	Male	Europe
771	2/21/2012 16:38:02	Statistics	Biology	3	3	Just right	Yes, at both levels	Yes, at both levels	Merged	20	Calculus	No	Other	Male	Europe
772	2/21/2012 16:52:04	Statistics, Theory, Decision making	Applied or pure mathematics	5	5	Too low	Yes, at both levels	Yes, at both levels	Merged	20	NA	Yes	Lecturer and above	Male	Europe
773	2/21/2012 16:53:59	Statistics, Theory	Biology	5	3	Just right	Yes, at both levels	No	Merged	20	NA	No	Lecturer and above	Male	North America
774	2/21/2012 17:12:14	Statistics	Biology	1	1	Too low	Yes, at undergraduate level	Yes, at undergraduate level	Merged	40	Probability, Geometry	No	Other	Female	Asia
775	2/21/2012 17:44:34	Statistics	Applied or pure mathematics	4	4	Too low	Yes, at both levels	Yes, at both levels	Merged	40	Calculus , Linear algebra	No	PhD student	Male	Europe
776	2/21/2012 17:47:57	Statistics	Biology	5	5	Too low	Yes, at undergraduate level	Yes, at undergraduate level	Separated	50	Calculus , Graph theory	Yes	Postdoc	Male	Europe
777	2/21/2012 17:53:33	Statistics, Theory	Biology	3	2	Just right	Yes, at graduate level	Yes, at both levels	Merged	30	Calculus , Graph theory	No	PhD student	Female	North America
778	2/21/2012 18:38:29	Statistics, Theory, Decision making	Biology	5	5	Too low	Yes, at both levels	Yes, at both levels	Merged	70	Graph theory	Yes	PhD student	Male	North America
779	2/21/2012 18:52:06	Statistics, Decision making	Biology	4	4	Too low	Yes, at both levels	Yes, at both levels	Merged	30	Probability, Calculus , Linear algebra , Graph theory	No	PhD student	Male	Europe
780	2/21/2012 19:03:17	Statistics	Biology	1	2	Too low	Yes, at both levels	Yes, at both levels	Merged	20	Probability, Calculus , Linear algebra , Graph theory, Geometry	No	PhD student	Female	North America
781	2/21/2012 20:50:40	Statistics	Biology	5	3	Too low	Yes, at undergraduate level	Yes, at both levels	Merged	10	Probability, Calculus , Linear algebra , Geometry	No	PhD student	Female	Europe
782	2/21/2012 21:06:33	Statistics, Theory, Decision making	Biology	5	5	Just right	Yes, at both levels	Yes, at both levels	Merged	60	Probability	Yes	Lecturer and above	Male	Europe
783	2/21/2012 21:08:46	Statistics, Decision making	Biology	2	3	Too low	Yes, at graduate level	Yes, at graduate level	Merged	20	Linear algebra , Graph theory	No	Other	Male	Asia
784	2/21/2012 21:42:28	Statistics	Other	5	5	Too low	Yes, at undergraduate level	Yes, at both levels	Separated	30	Probability	Yes	Lecturer and above	Male	Australia and New Zealand
785	2/21/2012 21:58:18	Statistics, Theory, Decision making	Biology	4	2	Just right	Yes, at both levels	Yes, at both levels	Separated	20	Linear algebra , Graph theory	No	PhD student	Female	North America
786	2/21/2012 22:15:34	Statistics	Biology	3	4	Just right	Yes, at both levels	Yes, at both levels	Separated	20	Probability, Calculus	No	Other	Male	Europe
787	2/22/2012 6:33:51	Statistics, Decision making	Biology	3	2	Just right	Yes, at both levels	No	Merged	10	Calculus , Graph theory	No	PhD student	Male	Europe
788	2/22/2012 9:28:31	Statistics	Biology	3	1	Too low	Yes, at both levels	Yes, at both levels	Separated	10	Probability, Calculus , Linear algebra	No	PhD student	Female	Europe
789	2/22/2012 9:56:25	Statistics	Other	1	1	Too low	Yes, at both levels	Yes, at both levels	Merged	20	Probability, Other	No	Other	Male	Europe
790	2/22/2012 10:21:21	Statistics	Biology	2	2	Too low	Yes, at both levels	Yes, at both levels	Merged	20	Probability, Calculus , Linear algebra , Graph theory, Geometry	No	Postdoc	Male	Europe
791	2/22/2012 10:26:23	Statistics	Biology	1	2	Too low	No	Yes, at both levels	Merged	20	Linear algebra , Graph theory	No	PhD student	Female	Australia and New Zealand
792	2/22/2012 10:52:30	Decision making	Biology	3	4	Just right	Yes, at both levels	Yes, at both levels	Separated	20	Graph theory	No	Postdoc	Female	Europe
793	2/22/2012 11:53:27	Statistics, Decision making	Biology	4	5	Just right	Yes, at both levels	Yes, at both levels	Merged	30	Graph theory, Geometry	Yes	Postdoc	Male	Europe
794	2/22/2012 13:25:09	Statistics	Biology	1	2	Too low	Yes, at both levels	Yes, at both levels	Separated	10	Probability, Calculus , Linear algebra , Graph theory, Geometry	No	Other	Male	Europe
795	2/22/2012 14:10:25	Statistics	Biology	5	5	Too low	Yes, at undergraduate level	Yes, at both levels	Separated	20	Probability, Linear algebra	No	Postdoc	Male	South America
796	2/22/2012 14:44:22	Statistics, Theory	Biology	4	3	Too low	Yes, at both levels	Yes, at both levels	Merged	20	Probability, Calculus , Linear algebra , Graph theory, Geometry, Other	No	Lecturer and above	Male	Europe
797	2/22/2012 15:27:54	Statistics, Theory	Biology	5	4	Too low	Yes, at graduate level	Yes, at both levels	Merged	10	Graph theory, Geometry	NA	Lecturer and above	Female	Europe
798	2/22/2012 15:28:36	Statistics	Biology	2	3	Just right	Yes, at undergraduate level	Yes, at both levels	Merged	20	Probability, Calculus	No	Postdoc	Male	Europe
799	2/22/2012 15:32:33	Statistics, Theory	Biology	2	2	Too low	Yes, at both levels	No	Merged	10	Probability, Calculus , Linear algebra , Graph theory, Geometry	No	Postdoc	Female	North America
800	2/22/2012 15:44:50	Statistics, Decision making	Biology	3	3	Too low	Yes, at undergraduate level	Yes, at both levels	Separated	0	Calculus , Linear algebra , Geometry	No	PhD student	Male	South America
801	2/22/2012 16:16:55	Statistics, Theory, Decision making	Biology	4	3	Just right	Yes, at both levels	Yes, at both levels	Merged	20	Calculus , Linear algebra , Graph theory	No	Lecturer and above	Female	Europe
802	2/22/2012 16:48:58	Statistics, Theory, Decision making	Biology	4	3	Too low	Yes, at both levels	Yes, at graduate level	Separated	30	Graph theory	No	Postdoc	Male	Europe
803	2/22/2012 16:53:08	Statistics, Theory	Biology	4	4	Too low	Yes, at graduate level	Yes, at both levels	Merged	30	Calculus , Linear algebra , Graph theory	No	PhD student	Male	Asia
804	2/22/2012 16:56:11	Statistics	Biology	3	1	Too low	NA	Yes, at both levels	Merged	30	Probability, Linear algebra , Graph theory, Other	No	PhD student	Male	Europe
805	2/22/2012 18:32:30	Statistics	Biology	4	3	Just right	Yes, at graduate level	Yes, at both levels	Separated	20	Calculus	No	PhD student	Male	North America
806	2/22/2012 19:29:22	Statistics, Decision making	Biology	3	3	Too low	Yes, at undergraduate level	Yes, at undergraduate level	Separated	10	Calculus	No	Lecturer and above	Male	Europe
807	2/22/2012 20:31:22	Statistics	Biology	2	2	Too low	Yes, at graduate level	Yes, at both levels	Merged	30	Calculus , Linear algebra , Graph theory, Geometry	No	Lecturer and above	Female	North America
808	2/22/2012 20:56:46	Statistics, Theory	Biology	3	3	Too high	No	No	Separated	10	Linear algebra	No	PhD student	Male	North America
809	2/22/2012 22:38:46	NA	Applied or pure mathematics	5	1	Just right	Yes, at both levels	Yes, at both levels	Merged	20	NA	Yes	Other	Female	Europe
810	2/23/2012 2:32:28	Statistics, Theory, Decision making	Biology	4	4	Too low	Yes, at both levels	Yes, at graduate level	Merged	20	Calculus	Yes	Lecturer and above	Male	Australia and New Zealand
811	2/23/2012 2:35:09	Statistics	Applied or pure mathematics	4	3	Too low	Yes, at both levels	Yes, at both levels	Merged	20	Calculus	No	Other	Female	North America
812	2/23/2012 5:04:44	Statistics, Theory	Biology	4	3	Too low	Yes, at both levels	Yes, at both levels	Separated	20	Calculus , Linear algebra , Graph theory	No	PhD student	Male	North America
813	2/23/2012 9:06:07	Statistics	Biology	4	1	Too low	Yes, at both levels	Yes, at both levels	Merged	30	Probability, Graph theory, Geometry, Other	No	Lecturer and above	Male	Europe
814	2/23/2012 9:34:03	Statistics, Theory	Physics	5	4	Too low	Yes, at undergraduate level	Yes, at undergraduate level	Separated	30	Probability, Calculus	Yes	Postdoc	Male	Europe
815	2/23/2012 10:08:32	Statistics	Biology	2	3	Too low	Yes, at both levels	Yes, at both levels	Merged	30	Probability, Linear algebra	No	PhD student	Female	Europe
816	2/23/2012 10:10:00	Statistics	Biology	1	1	Just right	No	Yes, at both levels	Separated	10	Probability, Calculus , Linear algebra	No	Postdoc	Female	Europe
817	2/23/2012 10:56:05	Statistics, Theory, Decision making	Other	5	5	Too low	Yes, at both levels	Yes, at both levels	Separated	20	Probability, Other	No	PhD student	Male	Europe
818	2/23/2012 10:59:36	Theory	Biology	3	5	Too low	Yes, at both levels	Yes, at both levels	Separated	20	Linear algebra , Graph theory	Yes	PhD student	Male	Europe
819	2/23/2012 11:04:52	Statistics, Theory	Biology	5	5	Too low	Yes, at both levels	Yes, at both levels	Separated	30	Probability, Calculus , Linear algebra	Yes	Postdoc	Female	Europe
820	2/23/2012 11:09:08	Statistics, Theory, Decision making	Biology	4	5	Too low	Yes, at graduate level	Yes, at graduate level	Separated	10	Calculus , Linear algebra , Graph theory	No	PhD student	Female	Europe
821	2/23/2012 11:14:26	Statistics, Theory	Other	3	4	Just right	Yes, at both levels	Yes, at both levels	Merged	20	Probability, Linear algebra , Graph theory	Yes	PhD student	Female	Europe
822	2/23/2012 11:37:07	Statistics, Theory	Biology	4	5	Too low	Yes, at undergraduate level	Yes, at undergraduate level	Separated	30	Probability, Linear algebra , Graph theory	No	PhD student	Female	Europe
823	2/23/2012 11:40:40	Statistics, Theory	Other	4	5	Too low	Yes, at graduate level	Yes, at graduate level	Separated	30	Probability, Calculus , Linear algebra	No	PhD student	Female	Europe
824	2/23/2012 11:42:02	Statistics	Biology	4	4	Just right	Yes, at graduate level	Yes, at both levels	Merged	20	Probability, Calculus	Yes	Postdoc	Male	Europe
825	2/23/2012 11:53:17	Statistics	Biology	4	3	Too low	Yes, at graduate level	Yes, at graduate level	Merged	30	Probability	No	PhD student	Male	Europe
826	2/23/2012 11:53:48	Statistics, Theory	Biology	3	5	Just right	Yes, at undergraduate level	Yes, at both levels	Separated	60	Linear algebra	No	PhD student	Female	Europe
827	2/23/2012 11:59:33	Statistics	Biology	1	4	Too low	No	Yes, at both levels	Merged	30	Probability, Calculus , Linear algebra , Graph theory, Geometry	No	Postdoc	Male	North America
828	2/23/2012 11:59:36	Statistics, Theory	Biology	2	5	Too high	No	Yes, at both levels	Merged	20	Probability	No	PhD student	Male	Europe
829	2/23/2012 12:05:42	Statistics	Other	3	3	Too low	Yes, at graduate level	Yes, at both levels	Merged	10	Calculus , Linear algebra , Graph theory	Yes	PhD student	Male	Europe
830	2/23/2012 12:06:44	Statistics, Decision making	Biology	5	5	Too low	Yes, at both levels	Yes, at both levels	Merged	30	Calculus , Graph theory	Yes	Postdoc	Male	Asia
831	2/23/2012 12:09:10	Statistics	Biology	NA	4	Too low	Yes, at both levels	Yes, at both levels	Separated	50	Probability, Calculus	No	PhD student	Male	Europe
832	2/23/2012 12:10:03	Statistics, Theory, Decision making	Other	4	4	Too low	Yes, at both levels	Yes, at both levels	Merged	20	Probability, Calculus , Linear algebra , Graph theory, Geometry	No	PhD student	Male	Europe
833	2/23/2012 12:24:52	Statistics, Theory	Biology	3	4	Just right	Yes, at graduate level	Yes, at graduate level	Separated	20	Linear algebra , Graph theory, Geometry, Other	No	PhD student	Male	Europe
834	2/23/2012 12:47:53	Statistics, Theory	Biology	5	5	Too low	No	Yes, at both levels	Separated	0	Calculus , Linear algebra , Graph theory, Geometry	No	PhD student	Male	Europe
835	2/23/2012 12:48:41	Statistics, Theory	Other	4	4	Too low	Yes, at both levels	Yes, at both levels	Merged	20	Probability	Yes	PhD student	Female	Europe
836	2/23/2012 13:21:22	Statistics	Biology	4	5	Too low	Yes, at both levels	Yes, at both levels	Merged	20	Probability, Graph theory	No	PhD student	Male	Europe
837	2/23/2012 13:58:44	Statistics	Other	4	3	Just right	Yes, at both levels	Yes, at undergraduate level	Merged	40	Probability, Calculus , Linear algebra , Graph theory	No	PhD student	Male	Europe
838	2/23/2012 15:03:25	Statistics, Theory	Biology	3	5	Too low	Yes, at graduate level	Yes, at both levels	Separated	30	Calculus , Linear algebra , Graph theory, Other	Yes	Postdoc	Male	Europe
839	2/23/2012 16:22:45	Statistics, Decision making	Biology	3	3	Too low	Yes, at both levels	Yes, at graduate level	Merged	20	Probability, Calculus , Linear algebra , Graph theory, Geometry	No	Postdoc	Female	Europe
840	2/23/2012 17:00:24	Theory	Physics	5	5	Too low	Yes, at both levels	Yes, at undergraduate level	Separated	20	Probability, Calculus , Linear algebra	Yes	Postdoc	Male	Europe
841	2/23/2012 17:05:13	Theory	Biology	5	5	Too low	Yes, at both levels	Yes, at both levels	Separated	20	Probability, Calculus , Linear algebra , Other	Yes	Lecturer and above	Male	Europe
842	2/23/2012 18:10:08	Statistics	Biology	4	2	Too low	Yes, at undergraduate level	Yes, at graduate level	Merged	20	Graph theory	No	PhD student	Male	North America
843	2/23/2012 19:59:02	Theory, Decision making	Other	1	5	Just right	Yes, at both levels	Yes, at graduate level	Merged	20	NA	Yes	Lecturer and above	Female	Europe
844	2/23/2012 20:03:56	Statistics	Other	5	5	Just right	No	Yes, at both levels	Merged	40	Other	Yes	PhD student	Female	Europe
845	2/23/2012 20:31:35	Statistics, Theory, Decision making	Other	5	5	Too low	Yes, at both levels	Yes, at both levels	Separated	50	Calculus , Linear algebra , Geometry	Yes	PhD student	Male	Europe
846	2/23/2012 21:27:19	Statistics, Theory	Other	4	5	Just right	Yes, at both levels	Yes, at both levels	Separated	30	Probability, Linear algebra , Other	No	PhD student	Male	Europe
847	2/23/2012 21:47:27	Statistics, Theory, Decision making	Biology	4	4	Too low	Yes, at graduate level	Yes, at both levels	Merged	20	Probability, Calculus , Linear algebra , Graph theory	No	Postdoc	Female	Australia and New Zealand
848	2/23/2012 22:09:29	Statistics, Theory	Biology	3	2	Just right	Yes, at both levels	Yes, at both levels	Merged	50	Probability, Linear algebra , Graph theory	No	PhD student	Female	North America
849	2/23/2012 22:17:26	Statistics	Biology	2	4	Too high	Yes, at both levels	Yes, at both levels	Merged	50	Other	No	PhD student	Female	Europe
850	2/23/2012 23:53:10	Statistics, Theory	Biology	4	4	Too low	Yes, at graduate level	Yes, at undergraduate level	Merged	20	Probability, Graph theory	No	PhD student	Male	Europe
851	2/24/2012 3:42:47	Statistics, Theory	Biology	5	3	Too low	Yes, at both levels	Yes, at both levels	Merged	30	Probability, Calculus , Linear algebra	No	PhD student	Male	North America
852	2/24/2012 4:14:26	Statistics	Other	3	3	Too low	Yes, at both levels	Yes, at both levels	Merged	30	Other	No	Other	Female	North America
853	2/24/2012 7:38:23	Statistics, Theory, Decision making	Biology	4	4	Too low	Yes, at both levels	Yes, at both levels	Merged	30	Probability, Calculus , Linear algebra , Graph theory, Geometry	No	Postdoc	Female	Europe
854	2/24/2012 8:08:08	Statistics, Theory	Biology	5	5	Too low	Yes, at graduate level	Yes, at graduate level	Separated	20	Calculus , Geometry	Yes	Postdoc	Male	Europe
855	2/24/2012 8:31:18	Statistics, Decision making	Biology	2	5	Too low	Yes, at both levels	Yes, at both levels	Merged	10	Probability, Calculus	No	PhD student	Male	Europe
856	2/24/2012 10:42:36	Statistics, Theory, Decision making	Biology	5	5	Just right	No	No	Merged	20	NA	Yes	Other	Male	Europe
857	2/24/2012 10:42:39	Statistics, Theory	Biology	3	3	Just right	Yes, at both levels	Yes, at both levels	Separated	60	Calculus , Graph theory	No	Other	Male	Europe
858	2/24/2012 11:12:19	Statistics, Decision making	Biology	5	2	Just right	Yes, at both levels	Yes, at undergraduate level	Merged	20	Calculus , Linear algebra , Graph theory	No	PhD student	Female	Europe
859	2/24/2012 14:22:00	Statistics	Biology	2	2	Too low	Yes, at undergraduate level	Yes, at undergraduate level	Merged	20	Probability, Graph theory, Other	No	PhD student	Male	Europe
860	2/24/2012 16:49:51	Statistics	Biology	1	3	Just right	No	No	Merged	50	Other	Yes	Other	Female	Europe
861	2/24/2012 16:54:23	Statistics, Theory, Decision making	Other	4	5	Too low	Yes, at both levels	Yes, at both levels	Separated	30	Probability, Calculus , Other	No	Postdoc	Male	North America
862	2/24/2012 17:54:08	Statistics, Theory, Decision making	Biology	3	3	Too low	Yes, at both levels	Yes, at both levels	Separated	40	Probability, Calculus , Linear algebra , Graph theory, Geometry	No	PhD student	Female	Europe
863	2/25/2012 4:47:47	Statistics	Biology	5	4	Too low	Yes, at graduate level	Yes, at both levels	Merged	20	Probability	Yes	PhD student	Female	North America
864	2/25/2012 11:12:27	Statistics, Theory	Biology	3	4	Just right	Yes, at both levels	Yes, at graduate level	Merged	20	Probability, Calculus , Linear algebra , Graph theory, Geometry, Other	No	Other	Female	Europe
865	2/25/2012 17:42:54	NA	Biology	1	1	Too low	Yes, at both levels	Yes, at both levels	Separated	20	Probability, Calculus , Linear algebra , Graph theory, Geometry	No	Other	Female	North America
866	2/26/2012 0:38:16	Statistics, Decision making	Biology	5	4	Too low	Yes, at both levels	Yes, at both levels	Separated	30	NA	Yes	Other	Male	North America
867	2/26/2012 8:42:03	Statistics, Decision making	Biology	4	4	Too low	Yes, at both levels	Yes, at both levels	Merged	50	Probability, Calculus , Linear algebra	No	Lecturer and above	Female	Europe
868	2/26/2012 13:54:53	Theory	Biology	5	5	Too low	Yes, at both levels	Yes, at undergraduate level	Merged	30	Calculus , Linear algebra , Graph theory	No	Postdoc	Male	Europe
869	2/26/2012 15:03:52	Statistics	Biology	3	4	Just right	Yes, at both levels	Yes, at both levels	Separated	80	Probability, Other	No	Other	Male	NA
870	2/26/2012 21:49:32	Statistics, Decision making	Other	5	5	Too low	Yes, at graduate level	Yes, at both levels	Merged	20	Calculus , Linear algebra	Yes	Other	Male	Australia and New Zealand
871	2/26/2012 22:04:16	Statistics, Theory	Biology	5	3	Just right	Yes, at graduate level	Yes, at graduate level	Merged	20	Calculus , Linear algebra	No	Other	Male	Australia and New Zealand
872	2/26/2012 22:43:11	Statistics, Theory, Decision making	Applied or pure mathematics	5	5	Too low	Yes, at both levels	Yes, at both levels	Separated	20	NA	Yes	Postdoc	Female	Europe
873	2/27/2012 0:00:07	Statistics	Biology	2	3	Too low	Yes, at graduate level	Yes, at both levels	Merged	20	Probability, Calculus	No	Postdoc	Female	Australia and New Zealand
874	2/27/2012 8:59:52	Statistics, Theory	Biology	3	5	Just right	Yes, at graduate level	No	Separated	20	Calculus , Linear algebra	No	Postdoc	Female	Europe
875	2/27/2012 11:15:32	Statistics	Biology	3	3	Too low	Yes, at graduate level	Yes, at graduate level	Merged	30	Calculus , Linear algebra	No	PhD student	Female	Europe
876	2/27/2012 13:26:18	Statistics	Biology	3	3	Too low	Yes, at graduate level	Yes, at both levels	Merged	20	Probability, Linear algebra , Graph theory	No	Postdoc	Male	South America
877	2/27/2012 13:39:22	Statistics	Biology	3	3	Too low	Yes, at both levels	Yes, at both levels	Separated	40	Probability, Calculus	No	PhD student	Male	Europe
878	2/27/2012 14:33:02	NA	Biology	3	1	Too low	Yes, at both levels	Yes, at both levels	Separated	30	Probability, Calculus , Linear algebra , Graph theory, Geometry	No	Other	Female	Europe
879	2/27/2012 19:10:51	Statistics	Biology	4	2	Too low	Yes, at both levels	Yes, at both levels	Merged	30	Calculus , Graph theory, Geometry	No	Lecturer and above	Female	Europe
880	2/27/2012 20:22:45	Statistics, Decision making	Biology	4	4	Just right	Yes, at both levels	Yes, at both levels	Merged	30	Graph theory	No	Postdoc	Male	South America
881	2/27/2012 20:37:12	Statistics	Other	5	4	Just right	Yes, at graduate level	Yes, at graduate level	Merged	30	Graph theory	Yes	Lecturer and above	Female	North America
882	2/27/2012 22:33:27	Statistics	Biology	4	2	Too low	Yes, at both levels	Yes, at both levels	Merged	30	Graph theory	No	PhD student	Female	Europe
883	2/28/2012 0:36:54	Statistics	Biology	3	2	Too low	Yes, at both levels	Yes, at both levels	Merged	40	Probability, Calculus , Graph theory	No	Postdoc	Male	Europe
884	2/28/2012 2:23:39	Decision making	Biology	3	3	Too low	Yes, at graduate level	Yes, at both levels	Separated	20	Probability, Calculus , Linear algebra , Graph theory	No	Other	Female	Australia and New Zealand
885	2/28/2012 10:17:17	Statistics	Biology	1	3	Too low	Yes, at undergraduate level	Yes, at both levels	Merged	10	Probability, Graph theory	No	PhD student	Male	Europe
886	2/28/2012 13:26:23	Statistics	Biology	5	3	Too low	Yes, at both levels	Yes, at graduate level	Merged	30	Probability, Calculus , Linear algebra	No	PhD student	Male	Europe
887	2/28/2012 14:32:00	Statistics, Theory	Other	5	5	Too low	Yes, at both levels	Yes, at both levels	Separated	30	Probability, Calculus , Graph theory, Other	No	PhD student	Female	Europe
888	2/28/2012 23:14:37	Statistics	Biology	2	2	Too low	Yes, at graduate level	Yes, at both levels	Merged	30	Probability, Geometry	No	PhD student	Female	North America
889	2/29/2012 6:54:43	Statistics, Decision making	Biology	1	2	Too low	Yes, at both levels	NA	Merged	20	Calculus , Linear algebra , Geometry	No	PhD student	Female	Australia and New Zealand
890	2/29/2012 10:43:07	Statistics	Biology	4	2	Too low	Yes, at both levels	Yes, at both levels	Merged	40	Probability, Calculus , Linear algebra	No	Postdoc	Male	North America
891	2/29/2012 11:19:51	Statistics, Theory, Decision making	Other	5	5	Too low	Yes, at both levels	Yes, at both levels	Separated	30	Graph theory	Yes	Postdoc	Female	Europe
892	2/29/2012 11:46:22	Statistics, Theory, Decision making	Biology	5	5	Too low	Yes, at both levels	Yes, at both levels	Merged	20	Graph theory	Yes	Lecturer and above	Male	Europe
893	2/29/2012 17:49:15	Statistics	Biology	2	2	Too low	Yes, at graduate level	Yes, at graduate level	Separated	20	Calculus , Linear algebra	No	Other	Male	Europe
894	3/1/2012 4:45:24	Statistics	Biology	3	2	Too low	No	Yes, at both levels	Separated	30	Probability, Calculus , Other	No	Postdoc	Female	Australia and New Zealand
895	3/1/2012 18:53:58	NA	Biology	1	2	Too low	Yes, at both levels	Yes, at both levels	Separated	10	Probability, Calculus , Graph theory	No	PhD student	Female	Europe
896	3/2/2012 9:04:41	Statistics, Theory, Decision making	Biology	3	2	Too low	Yes, at both levels	Yes, at both levels	Merged	30	Probability, Calculus , Linear algebra , Graph theory	No	PhD student	Female	Europe
897	3/2/2012 13:05:05	NA	Biology	4	4	Too low	Yes, at both levels	Yes, at both levels	Merged	40	Probability, Calculus , Linear algebra , Graph theory	NA	Lecturer and above	Female	Europe
898	3/2/2012 20:40:33	Statistics	Other	5	5	Too low	Yes, at both levels	Yes, at both levels	Merged	20	Other	Yes	Postdoc	Male	North America
899	3/3/2012 9:35:40	Statistics, Theory	Biology	3	2	Too low	Yes, at both levels	Yes, at both levels	Merged	30	Probability, Calculus , Linear algebra , Graph theory, Geometry	No	Postdoc	Female	Australia and New Zealand
900	3/3/2012 9:50:03	Statistics, Theory	Physics	5	5	Too low	Yes, at both levels	Yes, at both levels	Merged	20	Graph theory, Other	Yes	Lecturer and above	Male	North America
901	3/3/2012 13:30:02	Statistics, Theory	Biology	NA	4	Too low	Yes, at graduate level	Yes, at both levels	Merged	40	Probability, Linear algebra	No	Lecturer and above	Male	South America
902	3/5/2012 10:45:39	Statistics, Theory	Biology	4	3	Too low	Yes, at both levels	Yes, at both levels	Merged	20	Calculus , Linear algebra , Graph theory	No	Postdoc	Male	Europe
903	3/5/2012 11:31:16	Statistics, Theory, Decision making	Biology	5	4	Too low	Yes, at both levels	Yes, at both levels	Separated	30	Graph theory	Yes	Lecturer and above	Male	Europe
904	3/6/2012 17:08:56	NA	Biology	2	1	Too low	Yes, at undergraduate level	No	Separated	0	Probability, Linear algebra , Graph theory	No	Other	Male	North America
905	3/6/2012 17:41:23	Statistics, Theory	Biology	4	3	Too low	Yes, at both levels	Yes, at both levels	Merged	30	Probability, Calculus	No	PhD student	Female	North America
906	3/6/2012 17:41:48	Statistics, Theory	Biology	5	4	Too low	Yes, at both levels	Yes, at both levels	Separated	40	Probability	Yes	PhD student	Female	North America
907	3/6/2012 21:17:40	Statistics	Biology	5	3	Too low	Yes, at both levels	Yes, at both levels	Merged	30	Probability, Calculus , Linear algebra , Graph theory	No	Lecturer and above	Female	North America
908	3/9/2012 8:36:51	Statistics	Biology	2	3	Just right	Yes, at graduate level	Yes, at graduate level	Merged	20	Probability, Calculus	No	Lecturer and above	Male	Europe
909	3/9/2012 14:57:44	Statistics, Theory	Biology	5	4	Too low	Yes, at both levels	Yes, at both levels	Merged	30	Graph theory	Yes	Postdoc	Female	Europe
910	3/12/2012 11:46:39	Statistics	Biology	3	2	Too low	Yes, at both levels	Yes, at both levels	Merged	20	Probability, Calculus , Linear algebra , Graph theory, Geometry	No	PhD student	Female	Europe
911	3/12/2012 16:15:38	Statistics, Theory, Decision making	Biology	4	4	Too low	Yes, at both levels	Yes, at both levels	Merged	20	Probability, Calculus , Linear algebra	No	Postdoc	Male	North America
912	3/13/2012 12:48:12	Statistics	Other	1	1	Too low	Yes, at both levels	Yes, at both levels	Separated	40	Calculus , Linear algebra	No	PhD student	Male	Europe
913	3/13/2012 21:55:50	Statistics, Theory	Biology	2	2	Too low	Yes, at undergraduate level	Yes, at undergraduate level	Merged	20	Probability, Geometry	No	PhD student	Female	North America
914	3/14/2012 0:53:31	Statistics	Biology	4	4	Too low	Yes, at graduate level	Yes, at both levels	Merged	40	Calculus , Linear algebra , Graph theory	No	Postdoc	Male	Europe
915	3/14/2012 12:13:26	Statistics, Theory	Biology	4	4	Too low	Yes, at both levels	Yes, at both levels	Separated	20	Probability, Calculus , Graph theory	No	PhD student	Female	Europe
916	3/15/2012 1:07:50	Theory, Decision making	Biology	5	5	Too low	Yes, at undergraduate level	No	Merged	30	Graph theory, Geometry	Yes	Lecturer and above	Male	Europe
917	3/15/2012 9:42:09	Statistics	Biology	1	3	Too low	Yes, at both levels	Yes, at both levels	Separated	20	Probability, Graph theory	No	PhD student	Female	Europe
918	3/15/2012 13:55:55	Statistics, Theory, Decision making	Physics	4	5	NA	NA	NA	Separated	30	Graph theory, Geometry	Yes	Postdoc	Male	Europe
919	3/21/2012 8:40:41	Decision making	Applied or pure mathematics	3	2	Too low	Yes, at both levels	Yes, at both levels	Separated	30	Probability, Calculus , Linear algebra , Other	No	PhD student	Female	Australia and New Zealand
920	3/21/2012 21:57:18	Statistics, Theory	Biology	5	4	Too low	Yes, at both levels	Yes, at both levels	Merged	30	Probability, Calculus , Linear algebra , Graph theory	No	PhD student	Male	Europe
921	3/22/2012 15:52:01	Statistics	Biology	3	3	Too low	Yes, at graduate level	Yes, at both levels	NA	20	Calculus , Linear algebra , Graph theory	No	Other	Male	Europe
922	3/22/2012 19:08:04	Statistics	Biology	2	2	Just right	Yes, at graduate level	Yes, at both levels	Separated	20	Probability, Graph theory	No	Postdoc	Female	North America
923	3/29/2012 7:41:44	Statistics	Biology	2	3	Too low	Yes, at both levels	Yes, at both levels	Merged	30	Probability, Calculus , Linear algebra , Other	No	Other	Male	North America
924	4/4/2012 14:43:06	Statistics	Biology	2	2	Just right	Yes, at both levels	Yes, at both levels	Merged	40	Probability, Calculus , Linear algebra , Graph theory, Geometry	No	PhD student	Male	Europe
925	4/5/2012 6:25:03	Statistics, Theory	Biology	4	2	Too low	Yes, at undergraduate level	Yes, at undergraduate level	Separated	20	Calculus , Linear algebra , Geometry	No	Lecturer and above	Male	North America
926	4/5/2012 6:28:10	Statistics	Biology	5	4	NA	Yes, at undergraduate level	Yes, at both levels	Separated	30	Probability, Linear algebra , Geometry	Yes	Lecturer and above	Male	Australia and New Zealand
927	4/5/2012 7:13:29	Statistics	Biology	1	2	Too low	Yes, at undergraduate level	Yes, at both levels	NA	10	Probability, Calculus , Linear algebra , Graph theory, Geometry	No	Other	Male	Australia and New Zealand
928	4/5/2012 7:28:34	Statistics, Decision making	NA	2	2	Too low	Yes, at undergraduate level	Yes, at both levels	Merged	20	Probability, Graph theory	No	Lecturer and above	Male	Australia and New Zealand
929	4/5/2012 10:26:25	Statistics, Decision making	Biology	3	3	Too low	Yes, at undergraduate level	Yes, at undergraduate level	Merged	20	Probability, Calculus , Linear algebra	No	PhD student	Female	Australia and New Zealand
930	4/5/2012 17:35:39	Statistics, Theory	Biology	5	3	Too low	Yes, at both levels	Yes, at both levels	NA	30	Probability	Yes	Other	Male	Australia and New Zealand
931	4/6/2012 3:21:28	Statistics	Biology	3	2	Too low	No	Yes, at both levels	Merged	20	Calculus , Linear algebra	Yes	Other	Male	Australia and New Zealand
932	4/7/2012 8:41:00	Statistics	Other	2	3	Too low	Yes, at both levels	Yes, at both levels	Merged	10	Probability, Linear algebra , Graph theory	No	PhD student	Female	Australia and New Zealand
933	4/8/2012 11:26:40	Statistics	Biology	3	1	Just right	Yes, at both levels	Yes, at both levels	Merged	40	Calculus , Linear algebra , Graph theory, Other	No	Other	Male	Australia and New Zealand
934	4/9/2012 3:30:43	Statistics	Biology	3	2	Too low	Yes, at both levels	Yes, at both levels	Merged	30	Probability, Calculus , Linear algebra	No	Other	Male	Australia and New Zealand
935	4/9/2012 4:02:52	Statistics	Biology	4	4	Too low	Yes, at both levels	Yes, at both levels	Merged	20	Calculus , Linear algebra , Graph theory	No	PhD student	Male	Australia and New Zealand
936	4/9/2012 21:34:39	Statistics, Theory	Biology	3	3	Too low	Yes, at both levels	Yes, at both levels	Merged	70	Probability, Calculus , Linear algebra , Graph theory	No	Postdoc	Male	North America
937	4/10/2012 3:06:26	Statistics	Biology	4	2	Just right	Yes, at undergraduate level	Yes, at both levels	Separated	10	Probability	Yes	Other	Female	Australia and New Zealand
